# Supplementary material for: Evaluating methods to create protein functionalized catanionic vesicles
Source: Royal Society of Chemistry journal article supplement (doi:10.1039/d2sm01205g), 2023-01-01
Supplement: d2sm01205g1.pdf [file d2sm01205g1.pdf]

## Supporting Information: Evaluating Methods to Create Protein Functionalized Catanionic Vesicles

Paul Zayka<sup>1</sup>, Brendan Parr<sup>1</sup>, Hannah Robichaud<sup>1</sup>, Skyler Hickey<sup>1</sup>, Amber Topping<sup>1</sup>, Elizabeth Holt<sup>1</sup>, David Watts<sup>2</sup>, Nicholas Soto<sup>2</sup>, Daniel Stein<sup>3</sup>, Philip DeShong<sup>2</sup>, Matthew Hurley<sup>1,\*</sup>

1. Chemistry Department, Saint Anselm College; Manchester, NH 03102, USA
2. Department of Chemistry & Biochemistry, University of Maryland, College Park, MD 20742, USA
3. Department of Cell Biology and Molecular Genetics, University of Maryland, College Park, College Park, MD 20742, USA

### Table of Contents

|                                                                                 |    |
|---------------------------------------------------------------------------------|----|
| I. Protein Functionalization Studies                                            | 1  |
| II. Acid Phosphatase Assay Results                                              | 17 |
| III. Dynamic Light Scattering and Zeta Potential Analyses                       | 22 |
| IV. BCA Assay Limit of Detection Calculations                                   | 25 |
| V. Esterification Thin-Layer Chromatography Mass Spectroscopy                   | 28 |
| VI. Size Exclusion Chromatography Analyses                                      | 30 |
| VII. Percent Incorporation and Retention Calculations                           | 42 |
| VIII. Vesicle Concentration Calculations                                        | 45 |
| IX. Acid Phosphatase per Vesicle and Percent Surface Area Coverage Calculations | 46 |

### I. Protein-Functionalization Studies

#### BCA Assay Data

##### A. Representative BCA Assay Data of Vesicle formulations.

The following is representative BCA assay data depicting results of vesicle samples prepared and analyzed throughout the study. Standard solutions of acid phosphatase in PBS (1X, pH =7.4) were prepared from solid acid phosphatase. Vesicle samples were purified via SEC with PBS (1X, pH =7.4) as the eluent before vesicle samples were analyzed. Absorbance values were measured at 562 nm and were corrected by subtracting the PBS blank. The enhanced test tube BCA assay protocol was used.

**Table 1:** Absorbance values at 562 nm from a BCA Assay

| Sample               | Raw Absorbance at 562 nm | Corrected Absorbance at 562 nm (PBS blank subtracted) |
|----------------------|--------------------------|-------------------------------------------------------|
| PBS blank            | 0.150                    | 0.000                                                 |
| 12.5 µg/mL standard  | 0.218                    | 0.068                                                 |
| 25 µg/mL standard    | 0.249                    | 0.099                                                 |
| 50 µg/mL standard    | 0.321                    | 0.171                                                 |
| 100 µg/mL standard   | 0.484                    | 0.334                                                 |
| 200 µg/mL standard   | 0.734                    | 0.584                                                 |
| TX100 sample         | 0.181                    | 0.031                                                 |
| TXAP sample          | 0.188                    | 0.038                                                 |
| ETXAP sample-Trial 1 | 0.271                    | 0.121                                                 |
| ETXAP sample-Trial 2 | 0.242                    | 0.092                                                 |

**Sample Key**

TX100 = Triton X-100 enriched vesicles

TXAP = Triton X-100 enriched vesicles mixed with acid phosphatase

ETXAP = Esterified Triton X-100 enriched vesicles mixed with acid phosphatase—Trials 1 and 2

**Figure 1:** Standard curve generated from the BCA assay data in Table 1. Absorbance was measured at 562 nm.

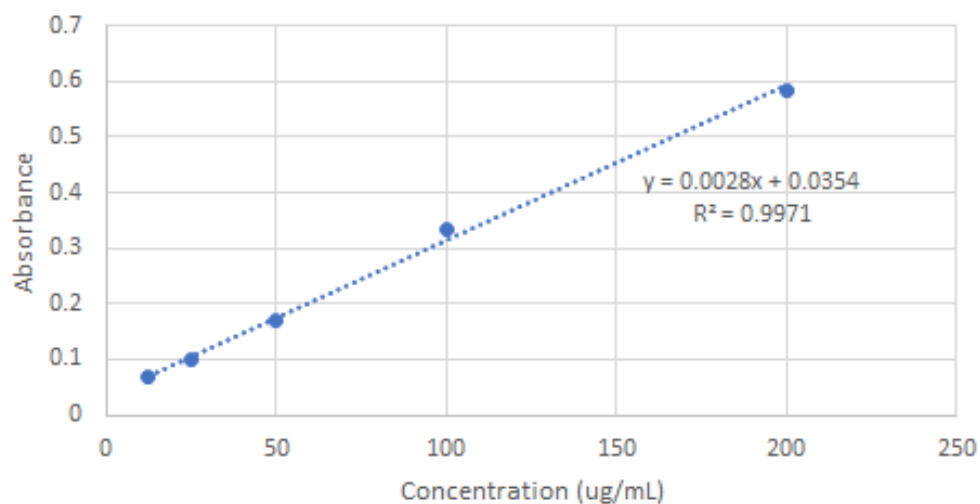

**Figure 2:** Absorbance spectra of acid phosphatase standard solutions.

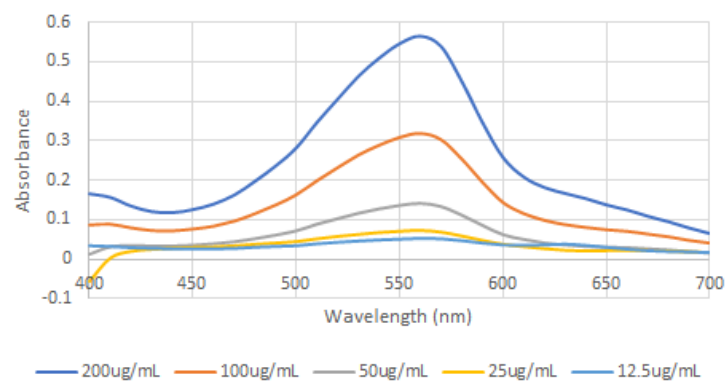

**Figure 3:** Absorbance spectra of acid phosphatase standard solutions and sample solutions.

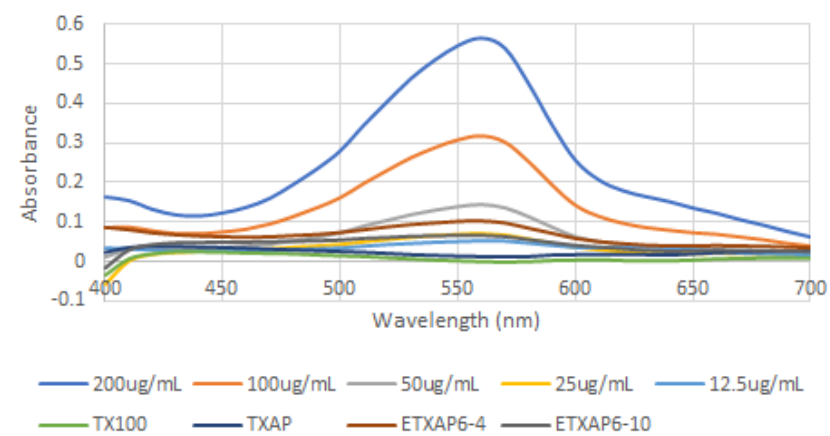

**Figure 4:** Picture of acid phosphatase standard solutions and sample solutions after BCA assay development.

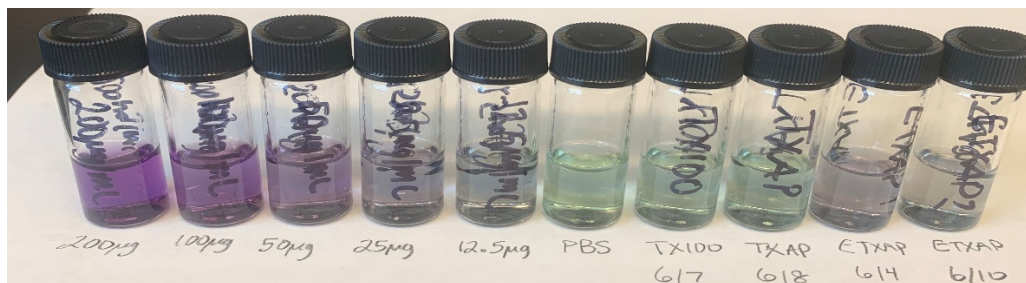

During the BCA assay, samples that contain protein undergo a color change from green to purple. The purple color intensifies with increasing protein concentrations. The 12.5, 25, 50, 100, and 200 µg markings refer to standard solutions of 12.5, 25, 50, 100, and 200 µg/mL. The sample marked “PBS” is the PBS blank sample.

### **Sample Key and Concentration Calculations**

TX100 = Triton X-100 enriched vesicles

$$0.031 = 0.0028x + 0.0354 = -1.57\mu\text{g/mL (Below LOD)}$$

TXAP = Triton X-100 enriched vesicles mixed with acid phosphatase

$$0.038 = 0.0028x + 0.0354 = 0.92\mu\text{g/mL (Below LOD)}$$

ETXAP = Esterified Triton X-100 enriched vesicles mixed with acid phosphatase—Trial 1

$$0.121 = 0.0028x + 0.0354 = 30.6 \mu\text{g/mL}$$

ETXAP = Esterified Triton X-100 enriched vesicles mixed with acid phosphatase—Trial 2

$$0.092 = 0.0028x + 0.0354 = 20.2 \mu\text{g/mL}$$

### **Control Experiment: BCA Assay of Esterified Triton X-100 enriched Vesicles Without Acid Phosphatase**

To ensure esterified Triton X-100 functionalized vesicles do not interfere with the BCA assay, a control experiment was conducted: esterified Triton X-100 functionalized vesicles that were not mixed with acid phosphatase were analyzed by the BCA assay. The results of that study are below.



**Figure 5:** Standard curve generated from the BCA assay

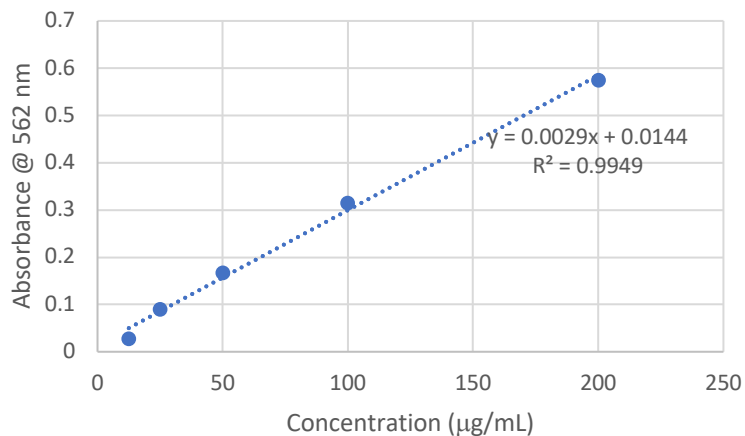

**Figure 6:** Absorbance spectra of acid phosphatase standard solutions and sample solutions.

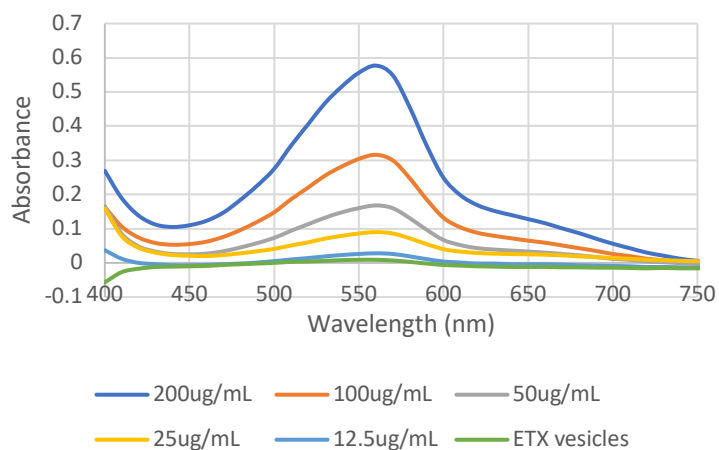

**Figure 7:** Picture of acid phosphatase standard solutions and sample solution after BCA assay development.

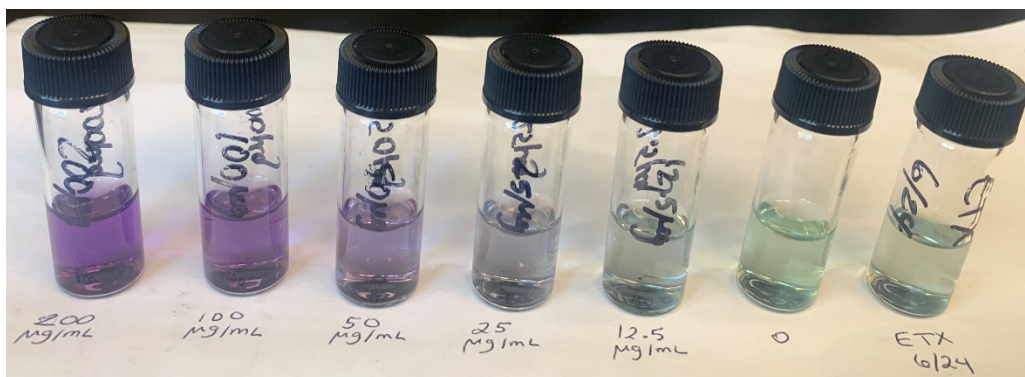

During the BCA assay, samples that contain protein undergo a color change from green to purple. The purple color intensifies with increasing protein concentrations. The sample marked with "0" is the PBS blank.

#### Sample Key and Concentration Calculation

ETX = Esterified Triton X-100 vesicles with NO acid phosphatase added.

$$0.009 = 0.0029x + 0.0144 = -1.86 \mu\text{g/mL (Below LOD)}$$

## B. Triton X-100 enriched vesicles mixed with acid phosphatase

To demonstrate that acid phosphatase does not nonspecifically bind to Triton X-100 enriched vesicles, Triton X-100 enriched vesicles were mixed with acid phosphatase and the vesicles were then purified by SEC. The purified vesicles were then analyzed for protein content via the BCA assay. The results of 6 trials are below.

**Table 2: BCA assay data from Trial 1 of Triton X-100 enriched vesicles mixed with acid phosphatase**

| Sample              | Corrected Absorbance at 562 nm (PBS blank subtracted) |
|---------------------|-------------------------------------------------------|
| PBS blank           | 0.000                                                 |
| 12.5 µg/mL standard | 0.068                                                 |
| 25 µg/mL standard   | 0.099                                                 |
| 50 µg/mL standard   | 0.171                                                 |
| 100 µg/mL standard  | 0.334                                                 |
| 200 µg/mL standard  | 0.584                                                 |
| TX100 sample        | 0.031                                                 |
| TXAP sample         | 0.038                                                 |

### Sample Key

TX100 = Triton X-100 enriched vesicles

TXAP = Triton X-100 enriched vesicles mixed with acid phosphatase

Note: this is the sample data from Table 1. See Figures 1-4 for graphical data.

**Table 3: BCA assay data from Trial 2 of Triton X-100 enriched vesicles mixed with acid phosphatase**

| Sample                  | Raw Absorbance at 562 nm | Corrected Absorbance at 562 nm (PBS blank subtracted) |
|-------------------------|--------------------------|-------------------------------------------------------|
| Phosphatase (200 µg/mL) | 0.703                    | 0.520                                                 |
| Phosphatase (100 µg/mL) | 0.537                    | 0.354                                                 |
| Phosphatase (50 µg/mL)  | 0.352                    | 0.169                                                 |
| Phosphatase (25 µg/mL)  | 0.240                    | 0.057                                                 |
| PBS                     | 0.183                    | 0.000                                                 |
| TX100 sample            | 0.162                    | -0.021                                                |
| TXAP sample             | 0.195                    | 0.012                                                 |

### Sample Key

TX100 = Triton X-100 enriched vesicles

TXAP = Triton X-100 enriched vesicles mixed with acid phosphatase

**Figure 8: Standard curve from Trial 2 of Triton X-100 enriched vesicles mixed with acid phosphatase**

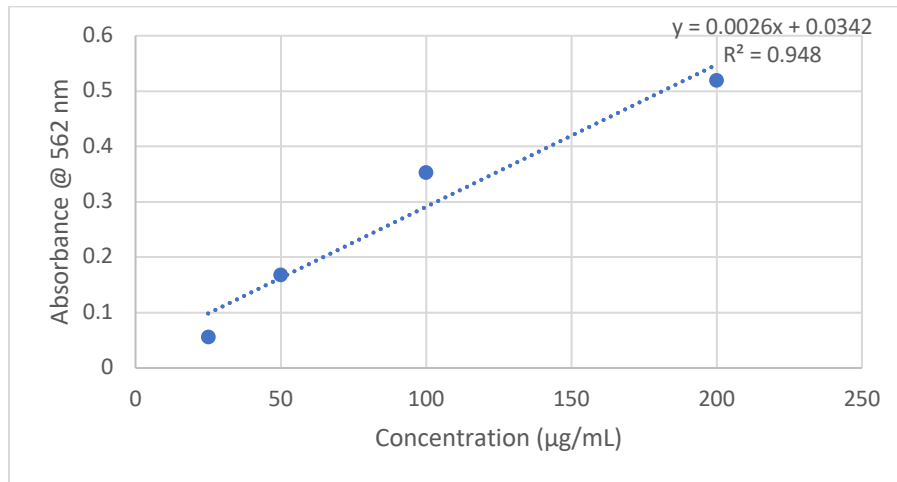

**Table 3: BCA assay data from Trial 3 of Triton X-100 enriched vesicles mixed with acid phosphatase**

| Sample                  | Raw Absorbance at 562 nm | Corrected Absorbance at 562 nm (PBS blank subtracted) |
|-------------------------|--------------------------|-------------------------------------------------------|
| Phosphatase (200 µg/mL) | 0.796                    | 0.615                                                 |
| Phosphatase (100 µg/mL) | 0.530                    | 0.349                                                 |
| Phosphatase (50 µg/mL)  | 0.356                    | 0.175                                                 |
| Phosphatase (25 µg/mL)  | 0.270                    | 0.089                                                 |
| PBS                     | 0.181                    | 0.000                                                 |
| TX100 sample            | 0.207                    | 0.026                                                 |
| TXAP sample             | 0.219                    | 0.038                                                 |

#### Sample Key

TX100 = Triton X-100 enriched vesicles

TXAP = Triton X-100 enriched vesicles mixed with acid phosphatase

**Figure 9: Standard curve from Trial 3 of Triton X-100 enriched vesicles mixed with acid phosphatase**

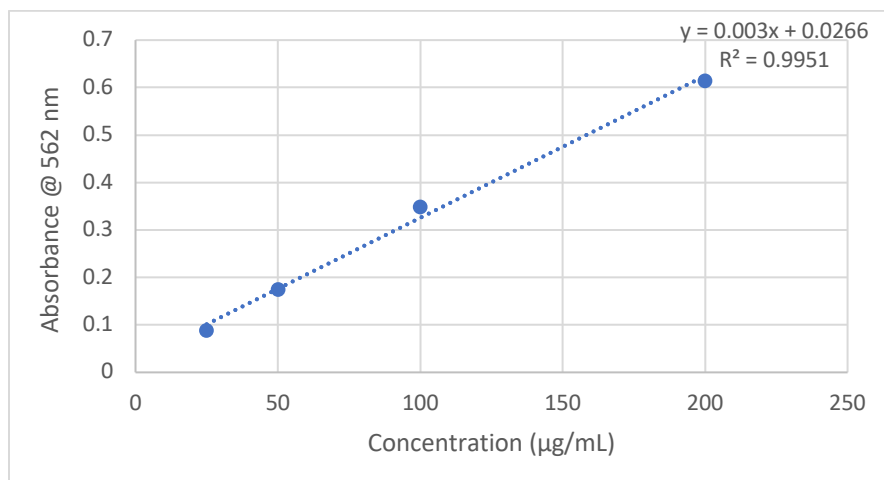

**Table 4: BCA assay data from Trials 4-6 of Triton X-100 enriched vesicles mixed with acid phosphatase**

| Raw Absorbance Values at 562 nm | Sample       | Trial 4 | Trial 5 | Trial 6 |
|---------------------------------|--------------|---------|---------|---------|
|                                 | PBS          | 0.178   | 0.187   | 0.206   |
|                                 | TX100 sample | 0.206   | 0.202   | 0.204   |
|                                 | TXAP sample  | 0.242   | 0.239   | 0.234   |
|                                 | 200 µg/mL    | 0.836   | 0.824   | 0.797   |
|                                 | 100 µg/mL    | 0.529   | 0.571   | 0.545   |
|                                 | 50 µg/mL     | 0.393   | 0.385   | 0.381   |
|                                 | 25 µg/mL     | 0.288   | 0.277   | 0.233   |

#### Sample Key

TX100 = Triton X-100 enriched vesicles

TXAP = Triton X-100 enriched vesicles mixed with acid phosphatase

**Figure 10: Standard curve from Trial 4 of Triton X-100 enriched vesicles mixed with acid phosphatase**

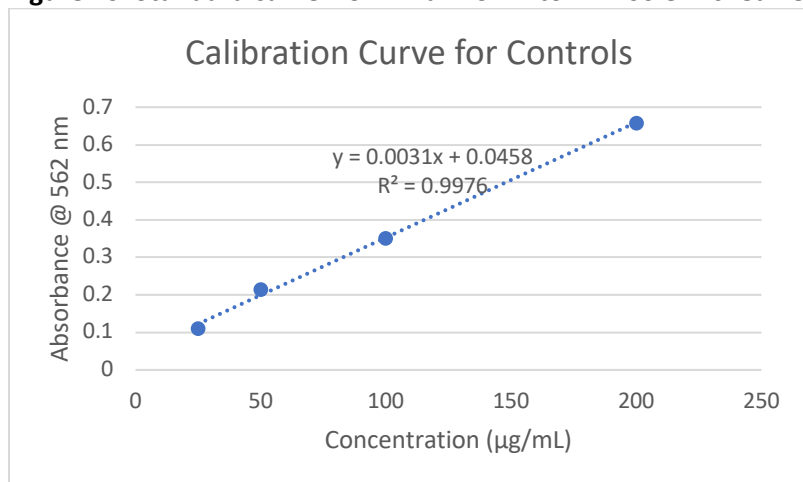

**Figure 11: Standard curve from Trial 5 of Triton X-100 enriched vesicles mixed with acid phosphatase**

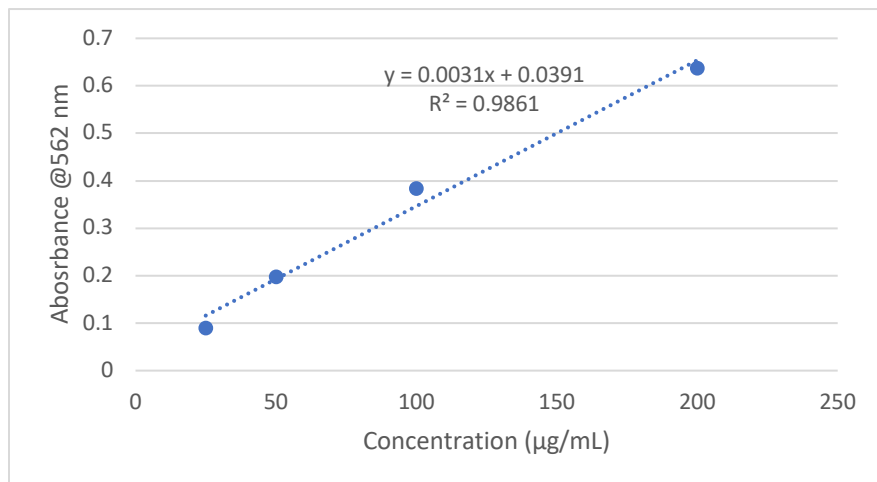

**Figure 12: Standard curve from Trial 6 of Triton X-100 enriched vesicles mixed with acid phosphatase**

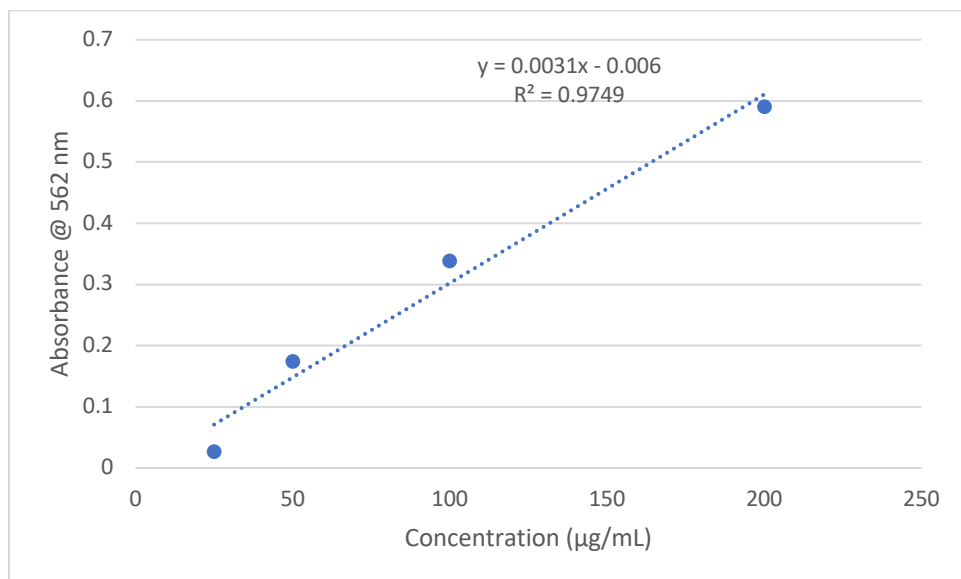

**Calculated concentration of acid phosphatase in Triton X-100 enriched vesicles mixed with acid phosphatase**

Trial 1: 0.92 µg/mL

Trial 2: -8.5 µg/mL

Trial 3: 3.8 µg/mL

Trial 4: 5.9 µg/mL

Trial 5: 4.1 µg/mL

Trial 6: 11 µg/mL

Average: 2.9 +/- 6.5 µg/mL

Average with trial 2 = 0: 4.2 +/- 3.9 µg/mL

**C. Maleimide-Functionalized Vesicles Mixed with Acid Phosphatase**

DSPE-PEG-Maleimide was incorporated into vesicles. Maleimide-functionalized vesicles were mixed with acid phosphatase and purified by SEC. The purified vesicles were then analyzed for protein content via the BCA assay. The results of 5 trials are below.

**Table 5: BCA assay data from Trials 1-4 of maleimide functionalized vesicles mixed with acid phosphatase**

| Corrected Absorbance Values at 562 nm | Sample              | Trial 1 | Trial 2 | Trial 3 | Trial 4 |
|---------------------------------------|---------------------|---------|---------|---------|---------|
|                                       | 25 µg/mL            | 0.038   | 0.078   | 0.096   | 0.077   |
|                                       | 50 µg/mL            | 0.079   | 0.145   | 0.234   | 0.2     |
|                                       | 100 µg/mL           | 0.407   | 0.249   | 0.366   | 0.329   |
|                                       | 200 µg/mL           | 0.545   | 0.436   | 0.638   | 0.625   |
|                                       | Maleimide-AP sample | -0.028  | 0.013   | 0.044   | 0.054   |

**Figure 13: Standard curve from Trial 1 of maleimide functionalized vesicles mixed with acid phosphatase**

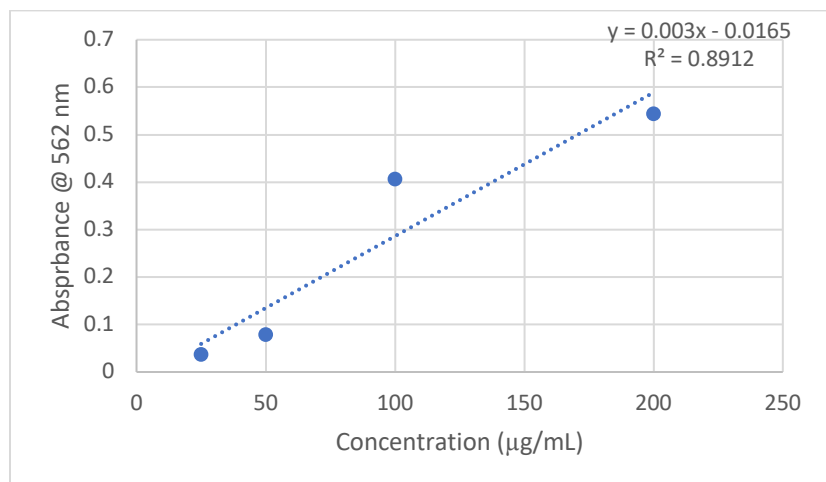

**Figure 14: Standard curve from Trial 2 of maleimide functionalized vesicles mixed with acid phosphatase**

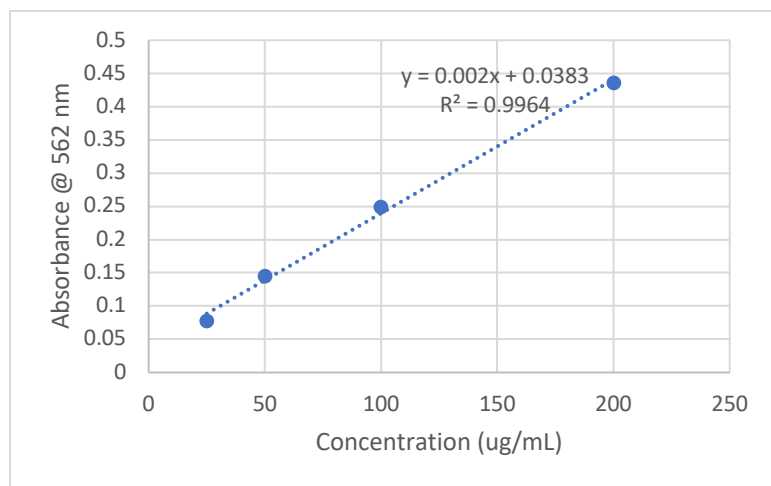

**Figure 15: Standard curve from Trial 3 of maleimide functionalized vesicles mixed with acid phosphatase**

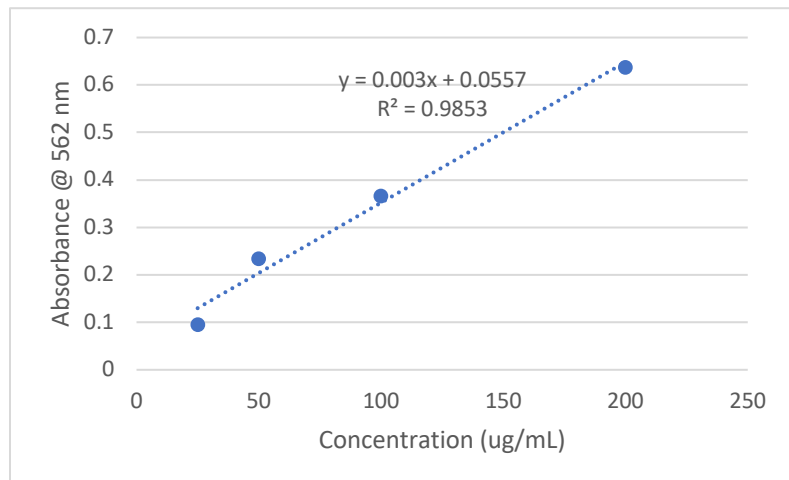

**Figure 16: Standard curve from Trial 4 of maleimide functionalized vesicles mixed with acid phosphatase**

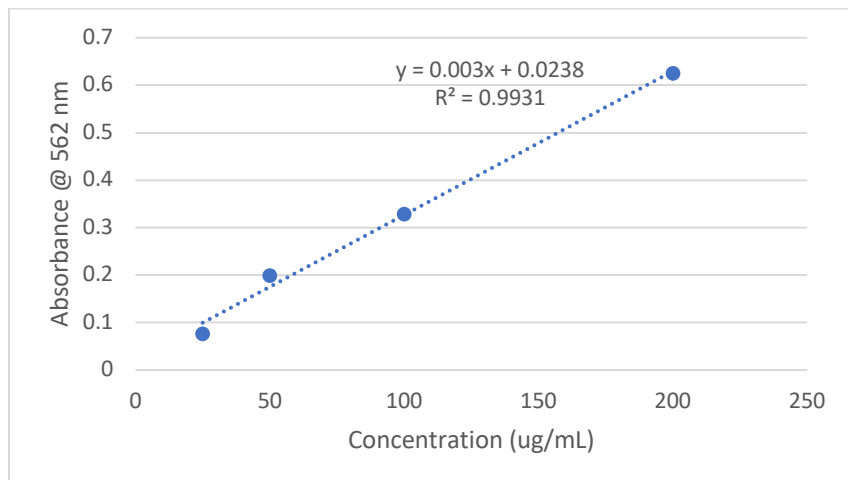

**Table 6: BCA assay data from Trial 5 of maleimide functionalized vesicles mixed with acid phosphatase**

| Sample              | Corrected Absorbance at 562 nm (PBS blank subtracted) |
|---------------------|-------------------------------------------------------|
| 12.5 µg/mL          | 0.090                                                 |
| 25 µg/mL            | 0.034                                                 |
| 50 µg/mL            | 0.135                                                 |
| 100 µg/mL           | 0.313                                                 |
| 200 µg/mL           | 0.654                                                 |
| Maleimide-AP sample | 0.005                                                 |

**Figure 17: Standard curve from Trial 5 of maleimide functionalized vesicles mixed with acid phosphatase**

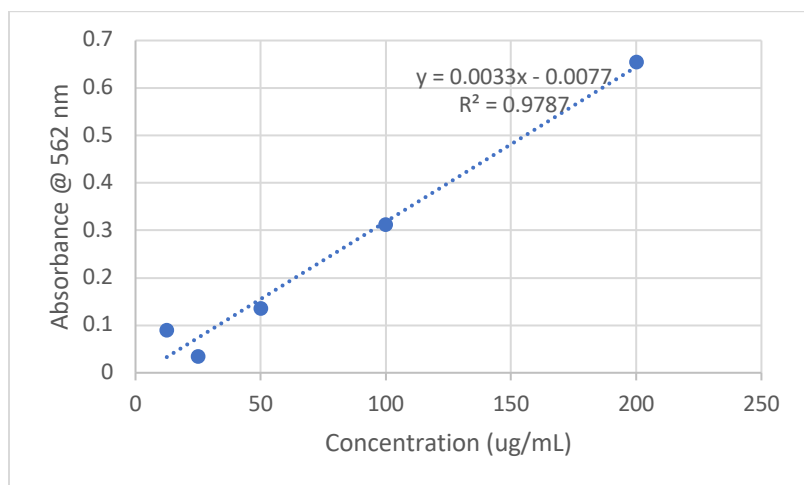

**Calculated concentration of acid phosphatase in maleimide-functionalized vesicles mixed with acid phosphatase**

Trial 1: -3.8 µg/mL

Trial 2: -12.7 µg/mL

Trial 3: -3.9 µg/mL  
 Trial 4: 10.1 µg/mL  
 Trial 5: 3.8 µg/mL

Average concentration +/- standard deviation: -1.3 +/- 8.6 µg/mL

Average and standard deviation of five trials with concentrations of trials 1, 2 and 3 = 0: 3 ± 4 µg/mL

## D. Esterified Triton X-100 Vesicles Mixed with Acid Phosphatase

Esterified Triton X-100 was incorporated into vesicles. Functionalized vesicles were mixed with acid phosphatase and purified by SEC. The purified vesicles were then analyzed for protein content via the BCA assay. The results of 6 trials are below.

**Table 7: BCA assay data from Trials 1-2 of esterified Triton X-100 enriched vesicles mixed with acid phosphatase**

| Sample               | Raw Absorbance at 562 nm | Corrected Absorbance at 562 nm (PBS blank subtracted) |
|----------------------|--------------------------|-------------------------------------------------------|
| PBS blank            | 0.150                    | 0.000                                                 |
| 12.5 µg/mL standard  | 0.218                    | 0.068                                                 |
| 25 µg/mL standard    | 0.249                    | 0.099                                                 |
| 50 µg/mL standard    | 0.321                    | 0.171                                                 |
| 100 µg/mL standard   | 0.484                    | 0.334                                                 |
| 200 µg/mL standard   | 0.734                    | 0.584                                                 |
| ETXAP sample-Trial 1 | 0.271                    | 0.121                                                 |
| ETXAP sample-Trial 2 | 0.242                    | 0.092                                                 |

### Sample Key

ETXAP = Esterified Triton X-100 enriched vesicles mixed with acid phosphatase—Trials 1 and 2

Note: this is the same data from Table 1. See Figures 1-4 for graphical data.

**Table 8: BCA assay data from Trial 3 of esterified Triton X-100 enriched vesicles mixed with acid phosphatase**

| Sample              | Absorbance @562nm | Corrected Absorbance |
|---------------------|-------------------|----------------------|
| 200 µg/mL standard  | 0.595             | 0.434                |
| 100 µg/mL standard  | 0.413             | 0.252                |
| 50 µg/mL standard   | 0.285             | 0.124                |
| 25 µg/mL standard   | 0.215             | 0.054                |
| 12.5 µg/mL standard | 0.182             | 0.021                |
| PBS                 | 0.161             | 0                    |
| TX100               | 0.179             | 0.018                |
| ETXAP—Trial 3       | 0.227             | 0.066                |

### Sample Key

ETXAP = Esterified Triton X-100 enriched vesicles mixed with acid phosphatase

TX100 = Triton X-100 enriched vesicles



**Figure 18: Standard curve from Trial 3 of esterified Triton X-100 enriched vesicles mixed with acid phosphatase**

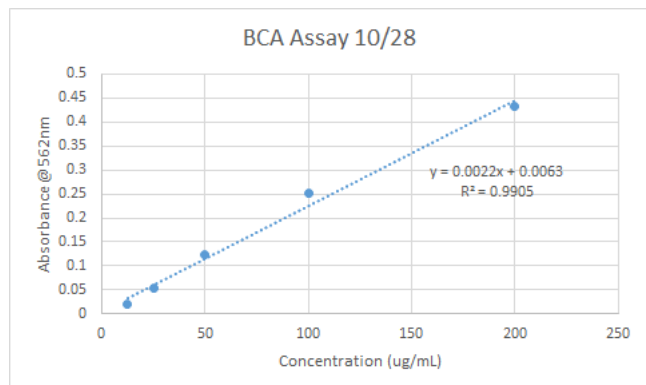

**Table 9: BCA assay data from Trials 4-5 of esterified Triton X-100 enriched vesicles mixed with acid phosphatase**

| Sample               | Corrected Absorbance at 562 nm (PBS blank subtracted) |
|----------------------|-------------------------------------------------------|
| 25 µg/mL standard    | 0.317                                                 |
| 50 µg/mL standard    | 0.401                                                 |
| 100 µg/mL standard   | 0.654                                                 |
| 200 µg/mL standard   | 1.091                                                 |
| ETXAP sample-Trial 4 | 0.340                                                 |
| ETXAP sample-Trial 5 | 0.407                                                 |

#### Sample Key

ETXAP = Esterified Triton X-100 enriched vesicles mixed with acid phosphatase

**Figure 19: Standard curve from Trials 4-5 of esterified Triton X-100 enriched vesicles mixed with acid phosphatase**

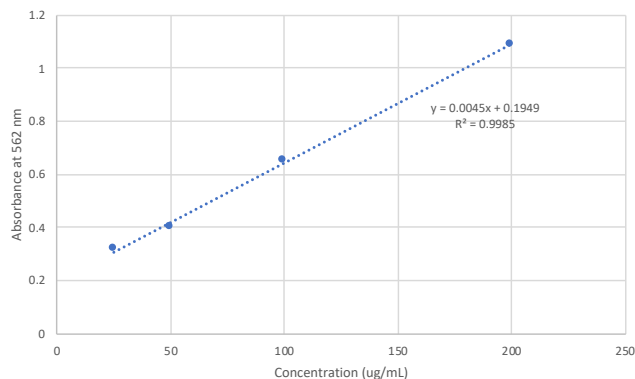

**Table 10: BCA assay data from Trial 6 of esterified Triton X-100 enriched vesicles mixed with acid phosphatase**

| Sample               | Corrected Absorbance at 562 nm (PBS blank subtracted) |
|----------------------|-------------------------------------------------------|
| 12.5 µg/mL standard  | 0.122                                                 |
| 25 µg/mL standard    | 0.135                                                 |
| 50 µg/mL standard    | 0.212                                                 |
| 100 µg/mL standard   | 0.365                                                 |
| 200 µg/mL standard   | 0.625                                                 |
| ETXAP sample-Trial 6 | 0.157                                                 |

**Sample Key**

ETXAP = Esterified Triton X-100 enriched vesicles mixed with acid phosphatase

**Figure 20: Standard curve from Trial 6 of esterified Triton X-100 enriched vesicles mixed with acid phosphatase**

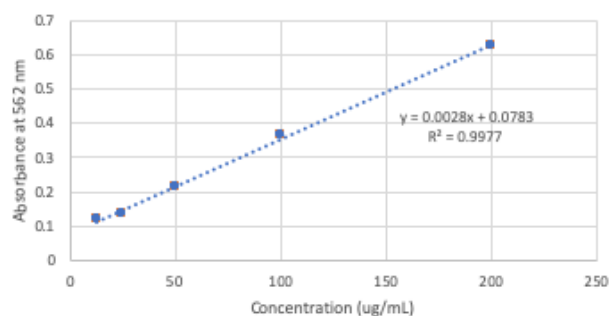

**Calculated concentration of acid phosphatase in esterified Triton X-100-functionalized vesicles mixed with acid phosphatase. These samples are also called AP vesicles.**

Trial 1: 30.6 µg/mL

Trial 2: 20.2 µg/mL

Trial 3: 27.1 µg/mL

Trial 4: 32.2 µg/mL

Trial 5: 47.1 µg/mL

Trial 6: 28.1 µg/mL

Average of 6 trials: 30.8 µg/mL

Standard deviation of 6 trials: 8.9 µg/mL

## E. Bare Vesicles Mixed with Acid Phosphatase

Bare vesicles were prepared, purified and mixed with acid phosphatase. After a second round of purification via SEC, vesicle samples were analyzed via the BCA assay. The results of two trials are below.

**Table 11: BCA assay data from trial 1 of bare vesicles mixed with acid phosphatase.**

| Sample     | Absorbance @562nm | Corrected |
|------------|-------------------|-----------|
| 200        | 1.517             | 1.359     |
| 100        | 1.022             | 0.864     |
| 50         | 0.669             | 0.511     |
| 25         | 0.417             | 0.259     |
| 12.5       | 0.313             | 0.155     |
| 0          | 0.158             | 0         |
| Bare w/ AP | 0.21              | 0.052     |

**Table 12: BCA assay data from trial 2 of bare vesicles mixed with acid phosphatase.**

| Sample     | Absorbance @562nm | Corrected |
|------------|-------------------|-----------|
| 200        | 0.772             | 0.638     |
| 100        | 0.492             | 0.358     |
| 50         | 0.344             | 0.21      |
| 25         | 0.223             | 0.089     |
| 12.5       | 0.182             | 0.048     |
| 0          | 0.134             | 0         |
| Bare w/ AP | 0.157             | 0.023     |

### Sample Key

Bare w/ AP = bare vesicles mixed with acid phosphatase

### **Calculated concentration of acid phosphatase in bare vesicles mixed with acid phosphatase**

Trial 1:

$$0.052 = 0.0064x + 0.1356$$

$$X = -13 \mu\text{g/mL} \Rightarrow 0 \mu\text{g/mL}$$

Trial 2:

$$0.023 = 0.0031x + 0.0265$$

$$X = -1.1 \mu\text{g/mL} \Rightarrow 0 \mu\text{g/mL}$$

## F. Electrostatic anchors

Acid phosphatase was labelled with cationic moieties that could be used to anchor the proteins to the surface of anionic vesicles. Acid phosphatase was labelled with a quaternary ammonium group and Rhodamine B. See Table 1, entries 3 and 4, in the article for the bifunctional linkers used to label acid phosphatase with cationic groups. Labelled acid phosphatase was mixed with pre-formed, purified anionic vesicles. Vesicles were then purified by SEC. The purified vesicles were then analyzed for protein content via the BCA assay. The results of the BCA assays are below.

**Table 13: BCA assay data and calculated protein concentration from cation-labelled acid phosphatase mixed with preformed anionic vesicles.**

| Sample                                              | Corrected Absorbance at 562 nm (PBS blank subtracted) | Calculated Protein Concentration ( $\mu\text{g/mL}$ ) |
|-----------------------------------------------------|-------------------------------------------------------|-------------------------------------------------------|
| $\text{N}(\text{CH}_3)_4^+\text{-AP}$ in BV—Trial 1 | 0.0245                                                | 12.5                                                  |
| $\text{N}(\text{CH}_3)_4^+\text{-AP}$ in BV—Trial 2 | -0.0168                                               | 0                                                     |
| Rhodamine B-AP in BV                                | -0.0362                                               | 0                                                     |

### Sample Key

$\text{N}(\text{CH}_3)_4^+\text{-AP}$  in BV = quaternary ammonium labelled acid phosphatase mixed with purified bare anionic vesicles.

Rhodamine B-AP in BV = Rhodamine B labelled acid phosphatase mixed with purified bare anionic vesicles.

## II. Acid Phosphatase Assay Results

### A. Percent of attached protein that retained enzymatic activity

Once conjugated to vesicles, the enzymatic activity of acid phosphatase was measured using a standard acid phosphatase assay with 4-nitrobenzene phosphate as the substrate. Activity was monitored by measuring the absorbance of the product (4-nitrophenol) generated by the enzymatic hydrolysis of the phosphate substrate. Absorbances were normalized by subtracting the absorbance values of negative samples—samples that contain the substrate and buffer but no enzyme. The percentage of enzyme that remained functional after conjugation was calculated based on the ratio of normalized absorbance values of vesicle samples to positive control samples and the concentration of protein in the samples (based on BCA assay results).

**Table 14: Acid phosphatase assay data from analysis of acid phosphatase functionalized vesicles.**

| Sample               | Absorbance @ 410 nm | Normalized Absorbance | Vesicle Sample : Positive Sample Ratio |
|----------------------|---------------------|-----------------------|----------------------------------------|
| negative             | 0.07                | 0                     |                                        |
| positive (30 µg/mL)  | 0.546               | 0.476                 |                                        |
| AP vesicles —Trial 3 | 0.124               | 0.054                 | 0.113445378                            |

#### Sample Key

Negative = negative control sample

Positive = Positive control sample = solution of acid phosphatase in PBS.

AP vesicles = acid phosphatase functionalized vesicles.

AP vesicles are esterified Triton X-100 enriched vesicles mixed with acid phosphatase (ETXAP). AP vesicles—Trial 3 is the same as ETXAP—Trial 3.

See Table 7 above for BCA assay data. BCA analysis indicated that sample contained 27 µg/mL of acid phosphatase.

#### Sample calculations to determine the amount of functional protein attached to vesicles

$$30 \times 0.113445 = 3.40336$$

$$\frac{3.40336}{27} \times 100 = 12.6\% \text{ functional protein}$$

**Table 15: Acid phosphatase assay data from analysis of acid phosphatase functionalized vesicles.**

| Sample               | Absorbance @ 410 nm | Normalized Absorbance | Vesicle Sample:Positive Sample Ratio |
|----------------------|---------------------|-----------------------|--------------------------------------|
| Negative             | 0.016               | 0                     |                                      |
| Positive (50 µg/mL)  | 0.6762              | 0.6602                |                                      |
| AP vesicles -Trial 4 | 0.0737              | 0.0577                | 0.087397758                          |
| AP vesicles -Trial 5 | 0.1121              | 0.0961                | 0.145561951                          |

**Sample Key**

Negative = negative control sample

Positive = Positive control sample = solution of acid phosphatase in PBS.

AP vesicles = acid phosphatase functionalized vesicles.

AP vesicles are esterified Triton X-100 enriched vesicles mixed with acid phosphatase (ETXAP). AP vesicles—Trial 4 is the same as ETXAP—Trial 4. AP vesicles—Trial 5 is the same as ETXAP—Trial 5.

See Table 8 above for BCA assay data. BCA analysis indicated that Trial 4 contained 32 µg/mL of acid phosphatase and Trial 5 contained 47 µg/mL.

**Table 16: Acid phosphatase assay data from analysis of acid phosphatase functionalized vesicles.**

| Sample               | Absorbance @ 410 nm | Normalized Absorbance | Vesicle Sample : Positive Sample Ratio |
|----------------------|---------------------|-----------------------|----------------------------------------|
| negative             | 0.0192              | 0                     |                                        |
| positive (50 µg/mL)  | 0.54487             | 0.52567               |                                        |
| AP vesicles -Trial 6 | 0.07371             | 0.05451               | 0.103696235                            |

**Sample Key**

Negative = negative control sample

Positive = Positive control sample = solution of acid phosphatase in PBS.

AP vesicles = acid phosphatase functionalized vesicles.

AP vesicles are esterified Triton X-100 enriched vesicles mixed with acid phosphatase (ETXAP). AP vesicles—Trial 6 is the same as ETXAP—Trial 6.

See Table 9 above for BCA assay data. BCA analysis indicated that Trial 4 contained 28 µg/mL of acid phosphatase.

### Calculated percent of functional protein attached to vesicles.

AP vesicles —Trial 3: 12.6%

AP vesicles —Trial 4: 13.7%

AP vesicles —Trial 5: 15.5%

AP vesicles —Trial 6: 18.5%

Average percent of functional protein attached to vesicles: 15.1%

### B. Statistical analysis of acid phosphatase assay data: comparing acid phosphatase standard solutions to mixtures of acid phosphatase with vesicles.

Mixtures of vesicles and acid phosphatase were analyzed via the acid phosphatase to determine if the presence of vesicles interferes with the assay. The data indicated that the presence of Triton X-100 enriched vesicles may be interfering with the assay. Below is the statistical analysis of acid phosphatase standard solutions (positive control samples of acid phosphatase in PBS) and solutions of acid phosphatase mixed with Triton X-100 enriched vesicles. The concentration of acid phosphatase in all samples was 50 µg/mL.

**Figure 21:** Effect of vesicles on the acid phosphatase assay

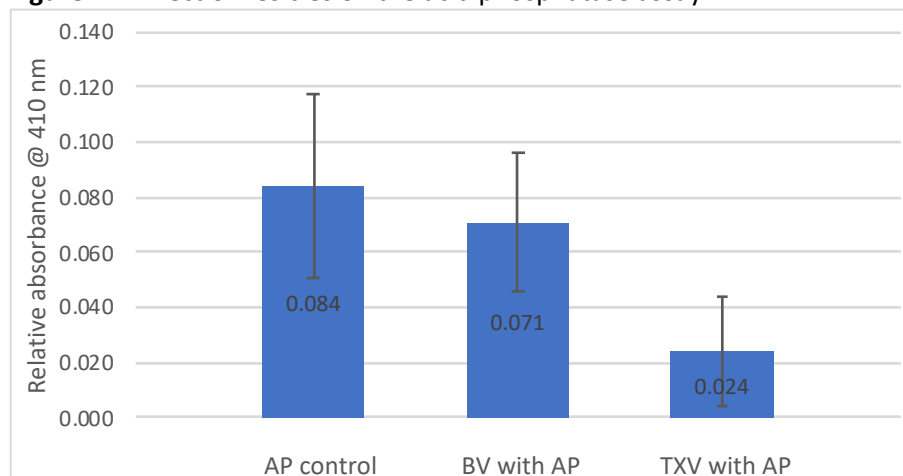

Sample key: AP control = acid phosphatase control sample; BV with AP = bare vesicles mixed with acid phosphatase; TXV with AP: Triton X-100 enriched vesicles mixed with acid phosphatase. Average values and standard deviation are represented. For AP control samples, n = 4; Mixtures of bare vesicles with acid phosphatase (BV with AP) and mixtures of Triton X-100 enriched vesicles with acid phosphatase (TXV with AP) show diminished activity compared to samples that do not contain vesicles (AP control). The difference between control samples and Triton X-100 enriched vesicles mixed with acid phosphatase (TXV with AP) was significant at the 99% confidence level. All samples contained 50 µg/mL of acid phosphatase and were analyzed in triplicate. Negative control samples (samples containing the substrate but no acid phosphatase) were used to normalize absorbance values.

**Table 17: Acid phosphatase assay data for comparing acid phosphatase solutions to mixtures of acid phosphatase and Triton X-100 enriched vesicles.**

| Entry | Sample        | Normalized Absorbance at 410 nm |
|-------|---------------|---------------------------------|
| 1     | Positive 1    | 0.078                           |
| 2     | Positive 2    | 0.128                           |
| 3     | Positive 3    | 0.082                           |
| 4     | Positive 4    | 0.048                           |
| 5     | TXV with AP 1 | 0.057                           |
| 6     | TXV with AP 2 | 0.043                           |
| 7     | TXV with AP 3 | 0.005                           |
| 8     | TXV with AP 4 | 0.005                           |
| 9     | TXV with AP 5 | 0.018                           |
| 10    | TXV with AP 6 | 0.022                           |
| 11    | TXV with AP 7 | 0.017                           |

### **Sample Key**

Positive = Positive control sample = solution of acid phosphatase in PBS.

TXV with AP = mixtures of acid phosphatase and Triton X-100 enriched vesicles.

Absorbance values were normalized by subtracting absorbance values of negative controls from sample absorbance values.

### **Statistical Values**

Average normalized absorbance values of positive control samples: 0.084

Standard deviation of normalized absorbance values of positive control samples: 0.03302524

Variance of normalized absorbance values of positive control samples: 0.00109067

Average normalized absorbance values of acid phosphatase and Triton X-100 mixture samples: 0.02385714

Standard deviation of normalized absorbance values of positive control samples: 0.01941158

Variance of normalized absorbance values of positive control samples: 0.00037681

To determine if there is a significant difference between the means of the positive controls and mixtures of acid phosphatase and Triton X-100 enriched vesicles a T-test was performed using the following equations (see reference 17, Chapter 4):



$$t_{\text{exp}} = \frac{|\bar{X}_A - \bar{X}_B|}{s_{\text{pool}} \times \sqrt{\frac{1}{n_A} + \frac{1}{n_B}}} = \frac{|\bar{X}_A - \bar{X}_B|}{s_{\text{pool}}} \times \sqrt{\frac{n_A n_B}{n_A + n_B}}$$

where  $s_{\text{pool}}$ , the pooled standard deviation, is

$$s_{\text{pool}} = \sqrt{\frac{(n_A - 1)s_A^2 + (n_B - 1)s_B^2}{n_A + n_B - 2}}$$

#### **F-test to determine if variance can be pooled**

$$F_{\text{exp}} = : 0.00109067/0.00037681 = 2.89447744$$

$$\text{Critical value for two tailed F-test} = F(0.05, 3, 6) = 6.599$$

$F_{\text{exp}} < F(0.05, 3, 6)$ ; therefore, variances were pooled.

#### **T-test analysis**

$$S_{\text{pool}} = \sqrt{\frac{(4 - 1)(0.00109067) + (7 - 1)(0.00037681)}{4 + 7 - 2}} = 0.02479439$$

$$t_{\text{exp}} = \frac{(0.084000 - 0.023857)}{0.02479439} \times \sqrt{\frac{(4)(7)}{4 + 7}} = 3.87002$$

$$\text{Critical value for two tailed T-test} = t(0.01, 9) = 3.250$$

$t_{\text{exp}} > t(0.01, 9)$ ; therefore, there is a significant difference between the means at a 99% confidence level. We conclude that Triton X-100 enriched vesicles interfere with the acid phosphatase assay.

### **C. Comparing the enzymatic activity of acid phosphatase standard solutions with mixtures of acid phosphatase and Triton X-100 enriched vesicles.**

Using the average normalized absorbance values of acid phosphatase standard solutions and mixtures of Triton X-100 enriched vesicles and acid phosphatase from Table 14, the percent of acid phosphatase in mixtures of Triton X-100 enriched vesicles and acid phosphatase was estimated to be 30%.

Average normalized absorbance values of positive control samples: 0.084

Average normalized absorbance values of acid phosphatase and Triton X-100 mixture samples: 0.024

### III. Dynamic Light Scattering and Zeta Potential Analyses

**Table 18: Dynamic Light Scattering Data**

| Sample                                        | Cumulant Measurement Z-Ave, nm | PdI          | Distribution Measurement Mean Diameter (stdev), nm |
|-----------------------------------------------|--------------------------------|--------------|----------------------------------------------------|
| bare vesicles—Measurement 1                   | 118.3                          | 0.245        | 126.6 (55.33)                                      |
| bare vesicles—Measurement 2                   | 121                            | 0.236        | 144.9 (74.16)                                      |
| bare vesicles—Measurement 3                   | 119.9                          | 0.246        | 141.4 (73.76)                                      |
| <b>bare vesicle averages</b>                  | <b>119.7</b>                   | <b>0.242</b> | <b>137.6 (67.75)</b>                               |
| Triton X-100 enriched vesicles—Measurement 1  | 116.4                          | 0.183        | 138.8 (64.33)                                      |
| Triton X-100 enriched vesicles—Measurement 2  | 116.2                          | 0.181        | 141.8 (69.81)                                      |
| Triton X-100 enriched vesicles—Measurement 3  | 114.3                          | 0.172        | 140.5 (66.72)                                      |
| <b>Triton X-100 enriched vesicles average</b> | <b>115.6</b>                   | <b>0.179</b> | <b>140.4 (66.95)</b>                               |
| TXAP—Trial 1—Measurement 1                    | 101.6                          | 0.104        | 113.9 (39.56)                                      |
| TXAP—Trial 1—Measurement 2                    | 102.2                          | 0.105        | 114.8 (40.58)                                      |
| TXAP—Trial 1—Measurement 3                    | 102.5                          | 0.097        | 115.0 (40.22)                                      |
| <b>TXAP—Trial 1 averages</b>                  | <b>102.1</b>                   | <b>0.102</b> | <b>114.6 (40.12)</b>                               |
| AP vesicles—Trial 1—Measurement 1             | 141.2                          | 0.316        | 169.5 (79.68)                                      |
| AP vesicles —Trial 1—Measurement 2            | 142.5                          | 0.251        | 171.4 (74.14)                                      |
| AP vesicles —Trial 1—Measurement 3            | 141.6                          | 0.270        | 166.4 (66.88)                                      |
| <b>AP vesicles —Trial 1 averages</b>          | <b>141.8</b>                   | <b>0.279</b> | <b>169.1 (73.57)</b>                               |
| AP vesicles —Trial 2—Measurement 1            | 141.5                          | 0.200        | 177.1 (95.00)                                      |
| AP vesicles —Trial 2—Measurement 2            | 141.1                          | 0.172        | 173.5 (85.46)                                      |
| AP vesicles —Trial 2—Measurement 3            | 140.9                          | 0.167        | 190.1 (109.5)                                      |
| <b>AP vesicles—Trial 2 averages</b>           | <b>141.2</b>                   | <b>0.180</b> | <b>180.2 (96.65)</b>                               |

#### Sample Key

TXAP = Triton X-100 enriched vesicles mixed with acid phosphatase

AP vesicles = acid phosphatase functionalized vesicles.

AP vesicles are esterified Triton X-100 enriched vesicles mixed with acid phosphatase (ETXAP). AP vesicles—Trial 1 is the same as ETXAP—Trial 1.

BCA data for TXAP and ETXAP samples can be found in Table 1 and Figures 1-4.

A Malvern ZetaSizer ZS was used for DLS analyses. Each DLS measurement is an average of 12 runs. The buffer material setting on the instrument was used for each measurement. The instrument indicated that the results of each measurement were good quality. The polydispersity index for each sample is relatively high and indicates that the distribution algorithm should be used for measurement and thus, average diameters reported in the article are based on intensity distribution algorithms. Representative size distribution by intensity graphs for each sample are below.

**Figure 22: Representative size distribution by intensity of bare vesicles**

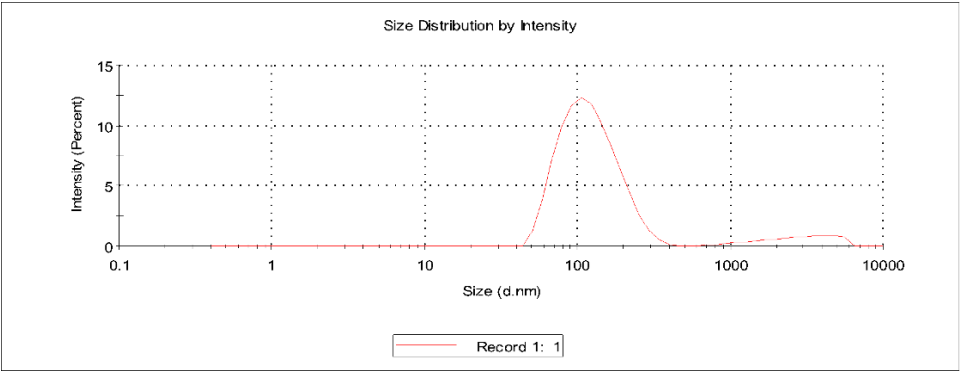

Note: The peak around 5  $\mu\text{m}$  is attributed to dust or air bubbles in the sample. The average size and standard deviation of bare vesicles was based on peaks centered around 100 nm.

**Figure 23: Representative size distribution by intensity of Triton X-100 enriched vesicles**

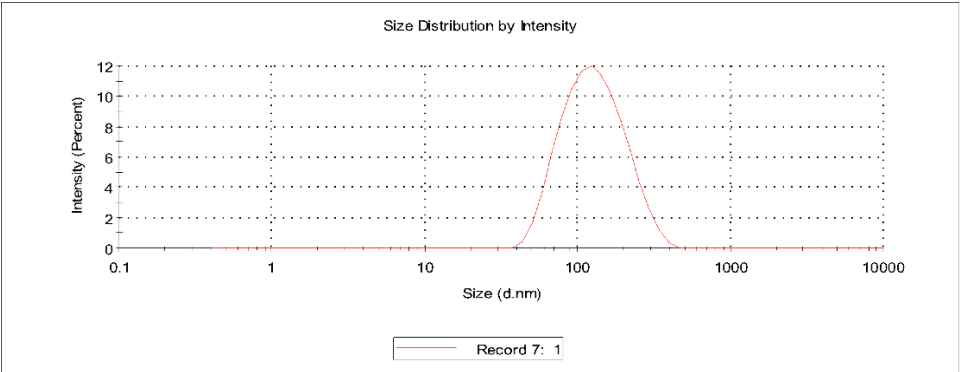

**Figure 24: Representative size distribution by intensity of Triton X-100 enriched vesicles mixed with acid phosphatase**

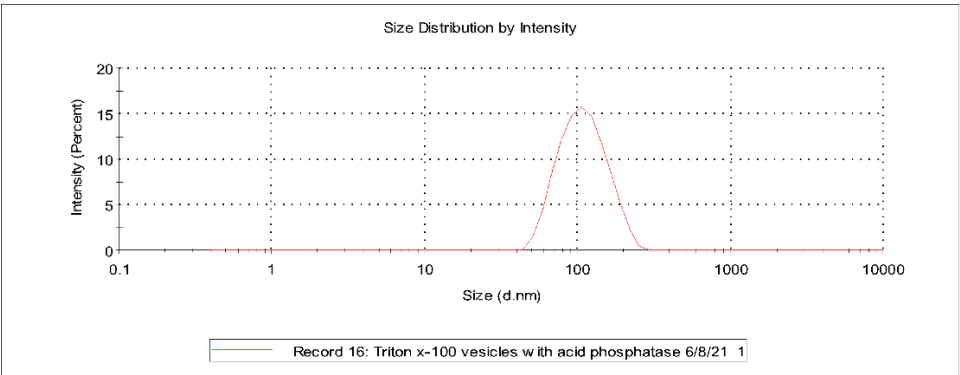

**Figure 25: Representative size distribution by intensity of AP vesicles — Trial 2**

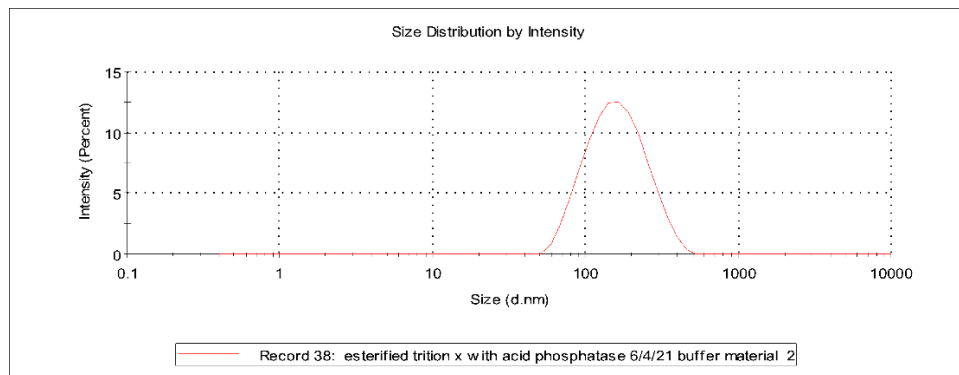

AP vesicles = acid phosphatase functionalized vesicles.

AP vesicles are esterified Triton X-100 enriched vesicles mixed with acid phosphatase (ETXAP). AP vesicles—Trial 1 is the same as ETXAP—Trial 1.

**Figure 26: Representative size distribution by intensity of AP vesicles — Trial 3**

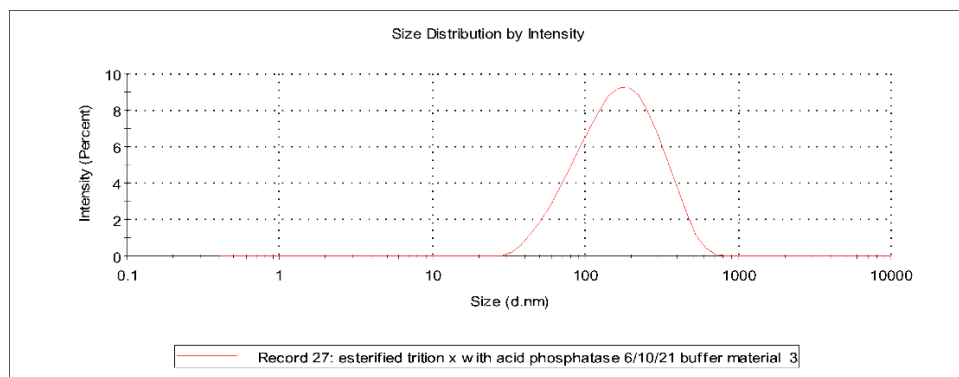

AP vesicles = acid phosphatase functionalized vesicles.

AP vesicles are esterified Triton X-100 enriched vesicles mixed with acid phosphatase (ETXAP). AP vesicles—Trial 2 is the same as ETXAP—Trial 2.

## IV. BCA Assay Limit of Detection Calculations

### A. LOD based on PBS blank samples and external calibration curves

The concentration of protein in PBS blank samples was determined by calculating the concentration of protein at an absorbance value of 0.000 using the equation from the linear regression line of external standard curves. All standard curves had  $R^2$  values greater than 0.90.

Twenty-one external calibration curves were analyzed and the equations of the linear regression lines are below:

**Table 19: BCA assay data used to determine the limit of detection based on external calibration curves.**

| Entry | Equation of linear regression line | Concentration of protein in PBS blank, $\mu\text{g/mL}$ |
|-------|------------------------------------|---------------------------------------------------------|
| 1     | $y = 0.0021x + 0.0199$             | -9.476190476                                            |
| 2     | $y = 0.0031x + 0.0458$             | -14.77419355                                            |
| 3     | $y = 0.0028x + 0.0114$             | -4.071428571                                            |
| 4     | $y = 0.0030x + 0.0266$             | -8.866666667                                            |
| 5     | $y = 0.0030x + 0.0238$             | -7.933333333                                            |
| 6     | $y = 0.0028x + 0.0354$             | -12.64285714                                            |
| 7     | $y = 0.0029x + 0.0144$             | -4.965517241                                            |
| 8     | $y = 0.0023x + 0.0107$             | -4.652173913                                            |
| 9     | $y = 0.0022x + 0.0063$             | -2.863636364                                            |
| 10    | $y = 0.0039x + 0.0438$             | -11.23076923                                            |
| 11    | $y = 0.0031x + 0.0265$             | -8.548387097                                            |
| 12    | $y = 0.0039x + 0.0438$             | -11.23076923                                            |
| 13    | $y = 0.0018x + 0.0121$             | -6.722222222                                            |
| 14    | $y = 0.0019x + 0.0009$             | -0.473684211                                            |
| 15    | $y = 0.0035x + 0.0069$             | -1.971428571                                            |
| 16    | $y = 0.0036x + 0.0122$             | -3.388888889                                            |
| 17    | $y = 0.0020x + 0.0383$             | -19.15                                                  |
| 18    | $y = 0.0028x - 0.0044$             | 1.571428571                                             |
| 19    | $y = 0.0032x + 0.0007$             | -0.21875                                                |
| 20    | $y = 0.0074x + 0.0498$             | -6.72972973                                             |
| 21    | $y = 0.0091x + 0.0791$             | -8.692307692                                            |

**Average calculated protein concentrations:** -7.001  $\mu\text{g/mL}$

**Standard deviation of calculated protein concentrations:** 5.135

The average and standard deviation of the calculated protein concentration in the PBS blank samples were used to calculate the limit of detection (LOD) for the BCA assay using the following equation:

$$LOD = \bar{C} + 2.528s$$

were  $\bar{C}$  is the average calculated protein concentration and  $s$  is the standard deviation of the calculated concentrations. The average calculated concentration was a negative value, therefore zero was used as the average value. 2.528 is the single-tailed Student's t-value for 21 samples at a 99% confidence level with  $n-1$  degrees of freedom.

$$LOD = 0 + 2.528 (5.135) = 13.0 \mu\text{g/mL}$$

**B. LOD based on bare vesicle and Triton X-100 enriched vesicles.**

The limit of detection was also estimated from the average and standard deviation of absorbance values of purified bare vesicles and Triton X-100 enriched vesicles that did not contain protein ( $n = 12$ ). The minimum distinguishable absorbance signal based on the 12 blank vesicle samples was calculated using the formula:

$$A_{min} = \bar{A} + 2.718s$$

where  $A_{min}$  is the minimum distinguishable absorbance value,  $\bar{A}$  is the average absorbance signal of the 12 samples, and  $s$  is the standard deviation of the 12 absorbance signals. 2.718 is the single-tailed Student's t-value for 12 samples at a 99% confidence level with  $n-1$  degrees of freedom

The corrected absorbance values (PBS blanks subtracted) of bare vesicles and Triton X-100 enriched vesicles used to determine the minimal distinguishable signal are below:

**Table 20: BCA assay data used to determine the limit of detection based on blank vesicle samples.**

| Entry | Corrected Absorbance at 562 nm |
|-------|--------------------------------|
| 1     | 0.041                          |
| 2     | -0.021                         |
| 3     | 0.026                          |
| 4     | 0.028                          |
| 5     | 0.015                          |
| 6     | -0.002                         |
| 7     | 0.000                          |
| 8     | 0.016                          |
| 9     | 0.018                          |
| 10    | 0.031                          |
| 11    | 0.010                          |
| 12    | 0.009                          |

**Average corrected absorbance values:** 0.01425

**Standard deviation of corrected absorbance values:** 0.01677728

**Minimum distinguishable signal at 99% confidence level:**

$$A_{min} = \bar{A} + 2.718s$$

$$A_{min} = 0.01425 + 2.718(0.01677728) = 0.05985066$$

LOD based on  $A_{min}$  of blank vesicle samples : 12.3  $\mu\text{g/mL}$

The LOD based on  $A_{\min}$  is the average calculated concentration from seven BCA assay external calibration curves with  $R^2$  values greater than 0.99.

## V. Thin-Layer Chromatography Mass Spectrometry of Esterified Triton X-100

To prepare the esterified Triton X-100 derivative, **1**, Triton X-100 was reacted with acryloyl chloride following a method reported by Oppolzer and coworkers. The reaction mixture was analyzed by thin layer chromatography-mass spectrometry. The mass spectra of Triton X-100 and the reaction mixture are depicted in Figure 27. Figure 27A is the mass spectrum of Triton X-100 and Figure 27B is the mass spectrum of the reaction mixture from the esterification of Triton X-100. In both spectra, peaks at 532.4, 576.4, 620.5, 664.5, 708.5, 752.5, and 796.4  $m/z$  are attributed to Triton X-100 molecules with different numbers of ethylene glycol units. In the spectrum of the reaction mixture, peaks appearing at 586.4, 630.4, 674.4, 718.4, 762.4, and 806.4  $m/z$  are attributed to esterified Triton X-100 molecules. The esterification adds 54 atomic mass units to Triton X-100 molecules. The difference between 532.4 and 586.4  $m/z$ , 576.4 and 630.4  $m/z$ , 620.5 and 674.4  $m/z$ , 664.5 and 718.4  $m/z$ , 708.5 and 762.4  $m/z$ , and 752.5 and 806.4  $m/z$ , is 54  $m/z$  units. The shift of 54  $m/z$  units indicates that the conversion to the ester was successful. The reaction did not go to completion, as unmodified Triton X-100 was still present in the reaction mixture, but the amount of esterified conjugate in the mixture was enough to carry the mixture forward into vesicle formulations.

**Figure 27:** Electrospray ionization (ESI) mass spectra of Triton X-100 and esterified Triton X-100 reaction mixture.

### A. Triton-X 100 mass Spectrum

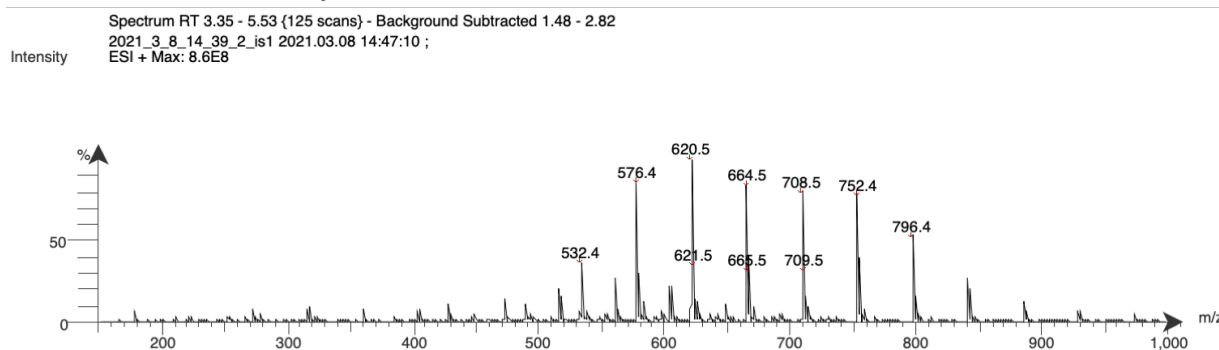

### B. Esterified Triton-X 100 reaction mixture mass spectrum

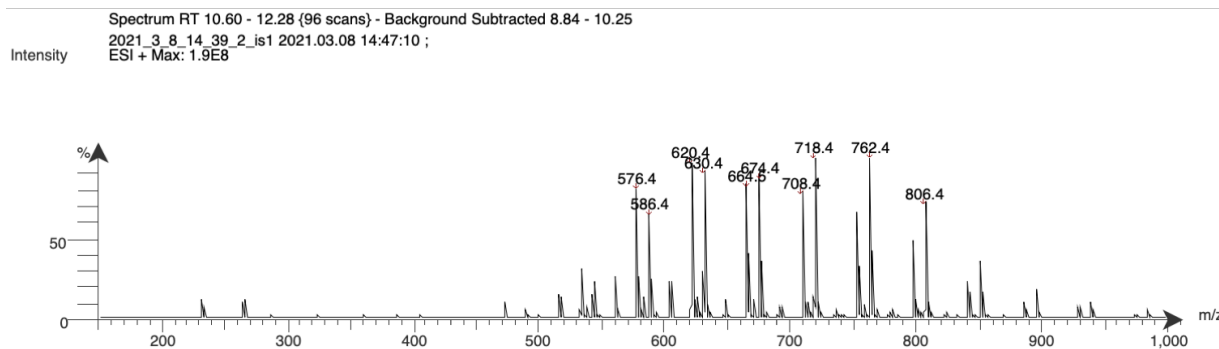

Positive mode ESI-MS of Triton X-100 (A) and esterified Triton X-100 reaction mixture (B). Peaks appearing at 586.4, 630.4, 674.4, 718.4, 762.4, and 806.4  $m/z$  in the esterified Triton X-100 reaction mixture are attributed to esterified Triton X-100 molecules.



Figure 28: Electrospray ionization (ESI) mass spectra of esterified Triton X-100 enriched vesicles.

A. Unpurified vesicle mixture

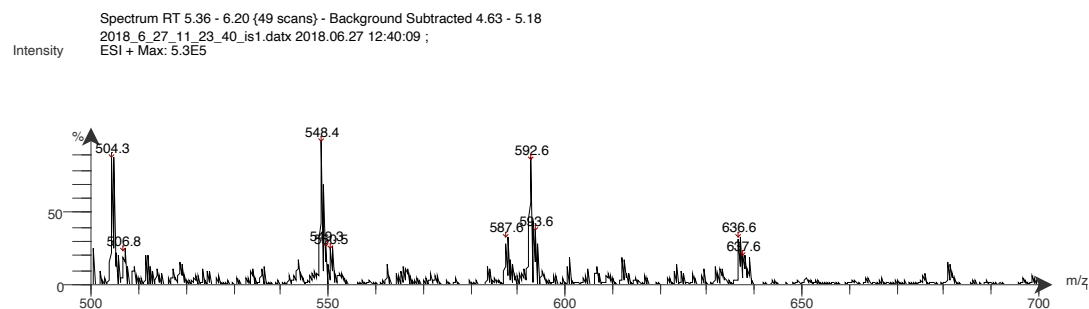

B. SEC purified vesicle fraction

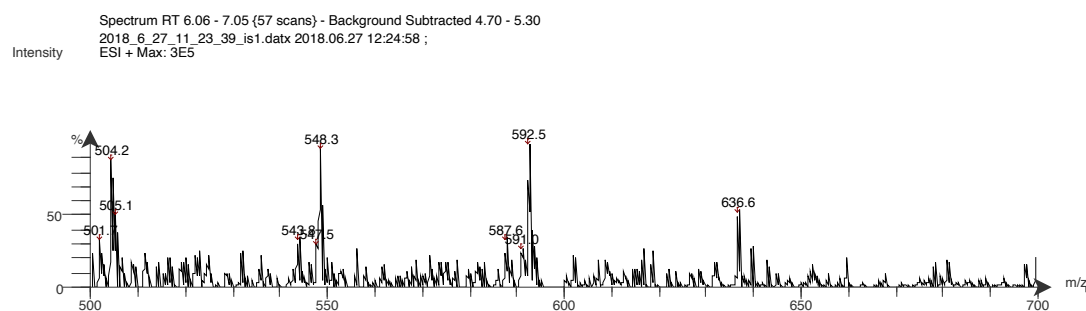

## VI. Size Exclusion Chromatography Analyses

To assess the ability of Sepharose CL-2B size exclusion chromatography (SEC) to separate vesicles from excess surfactant and ligands, gravimetric, thin layer chromatography (TLC),  $^1\text{H}$ -NMR, and TLC-MS analyses were performed.

### Gravimetric, TLC, and $^1\text{H}$ -NMR Analyses of SDBS/CTAT Vesicles

A CD-10 column was packed with Sepharose CL-2B to a height of 5.5 cm. Anionic SDBS:CTAT vesicles were prepared in Millipore water at a total surfactant concentration of 1% by weight (70:30 SDBS:CTAT weight ratio). One milliliter of the vesicle solution was purified by SEC with Millipore water as the eluent and 1 mL fractions were collected up to fraction 13. Vesicles eluted in fractions 3.1-5.0 mL, so those fractions were combined. This process was repeated two more times and the fractions from the three purifications were pooled in pre-weighed vials. The samples were lyophilized, the mass of each sample was obtained, and the average mass of each fraction was calculated. The results are provided in Figure 28.

Figure 28: Gravimetric analysis of anionic SDBS/CTAT vesicles.

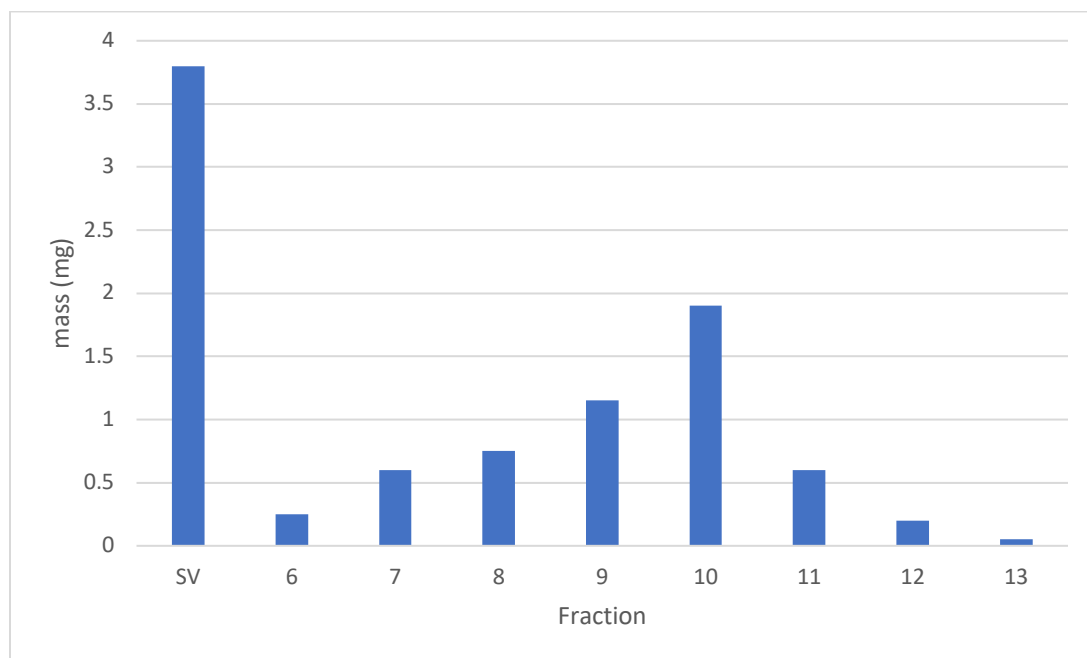

The SV fraction is the combination of fractions 3 to 5 (mL 3.1-5.0)

Fractions from the gravimetric analysis were further analyzed by TLC and  $^1\text{H}$ -NMR. TLC analyses were performed on silica plates developed in  $\text{CHCl}_3$ :MeOH: $\text{H}_2\text{O}$ :acetic acid (10:5:1:1) and visualized under UV and phosphoric acid and copper char. TLC analyses showed that SDBS and CTA (cetyltrimethylammonium cation) were present in the SV fraction and SDBS and tosylate were present in later fractions.

Figure 29: TLC Analyses

A: TLC Analysis of Crude (Unpurified) Vesicles and SDBS and CTAT

Lane 1: SDBS  
Lane 2: **Crude BV**  
Lane 3: CTAT

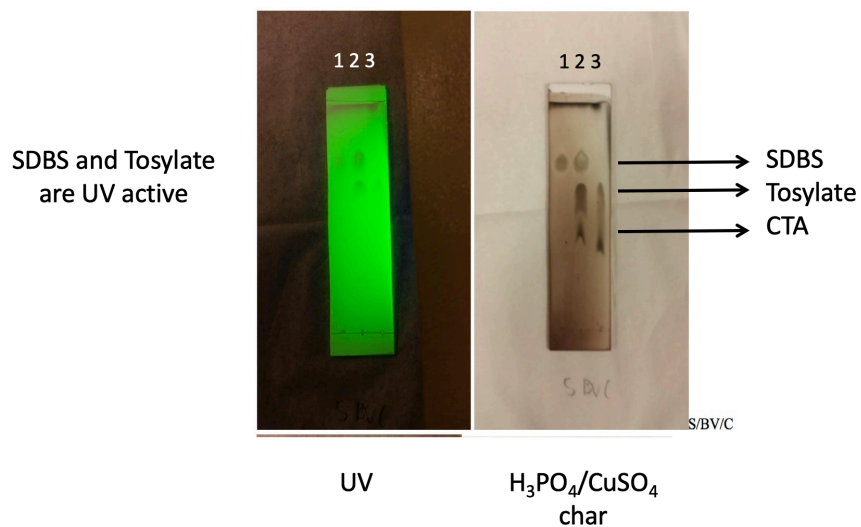

B: TLC Analysis of Purified Vesicles (SV fraction)

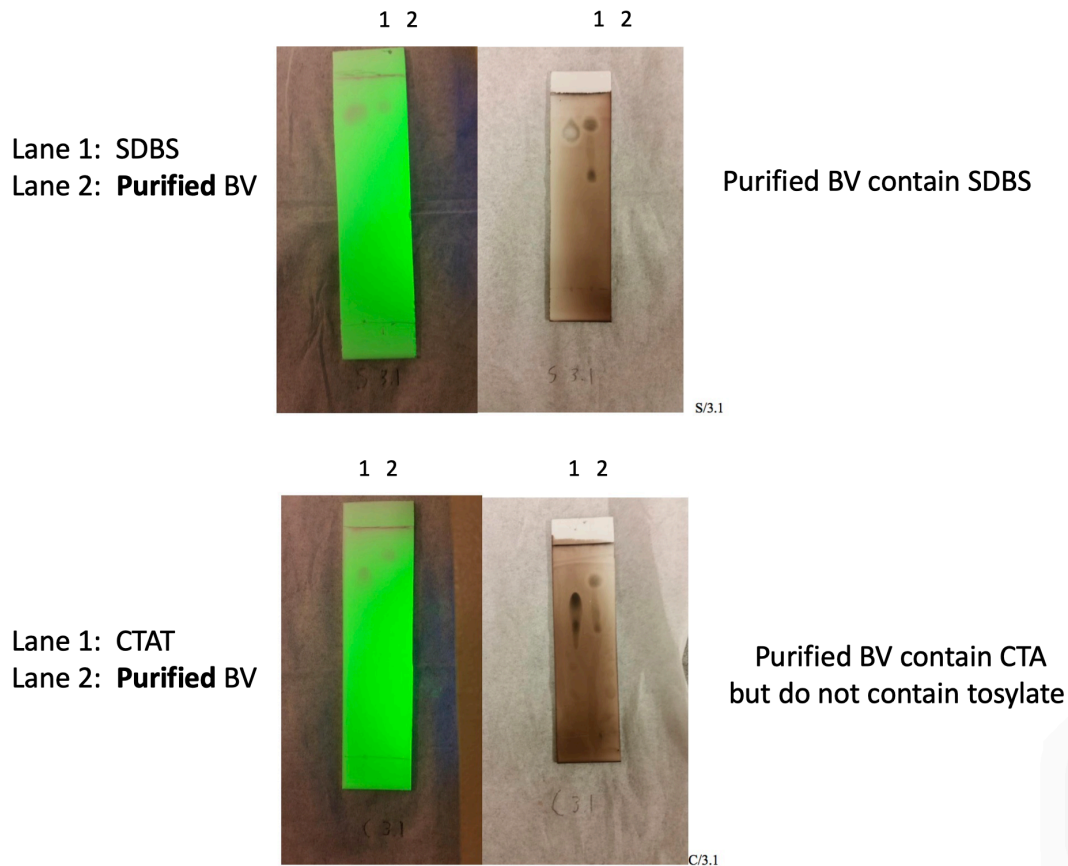

### C: TLC Analysis of Fractions 8-11

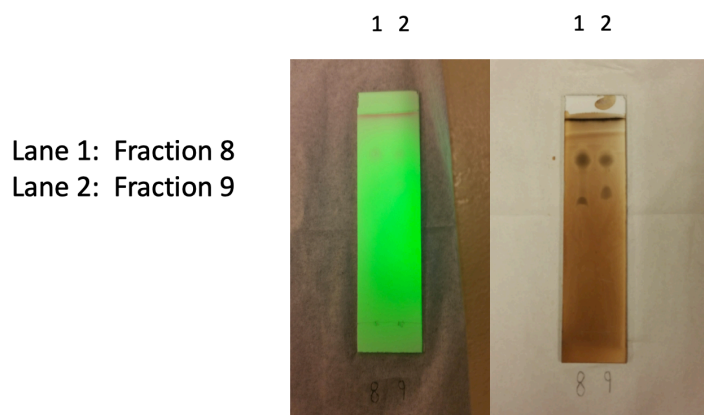

Later fractions contain  
SDBS and tosylate

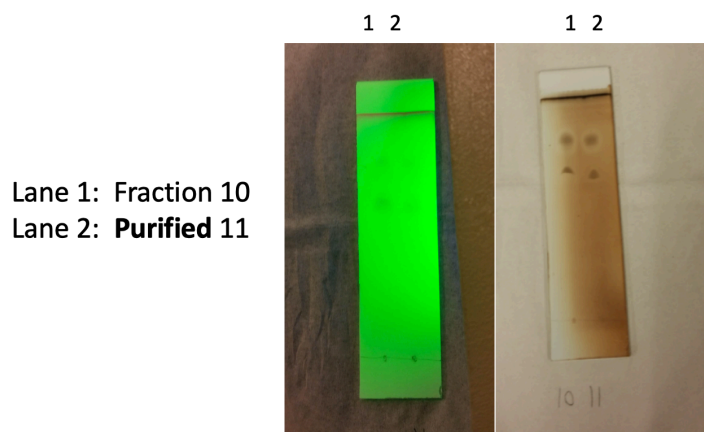

### A: $^1\text{H}$ -NMR Spectrum of CTAT

### C: $^1\text{H}$ -NMR Spectrum of purified vesicles (SV fraction)

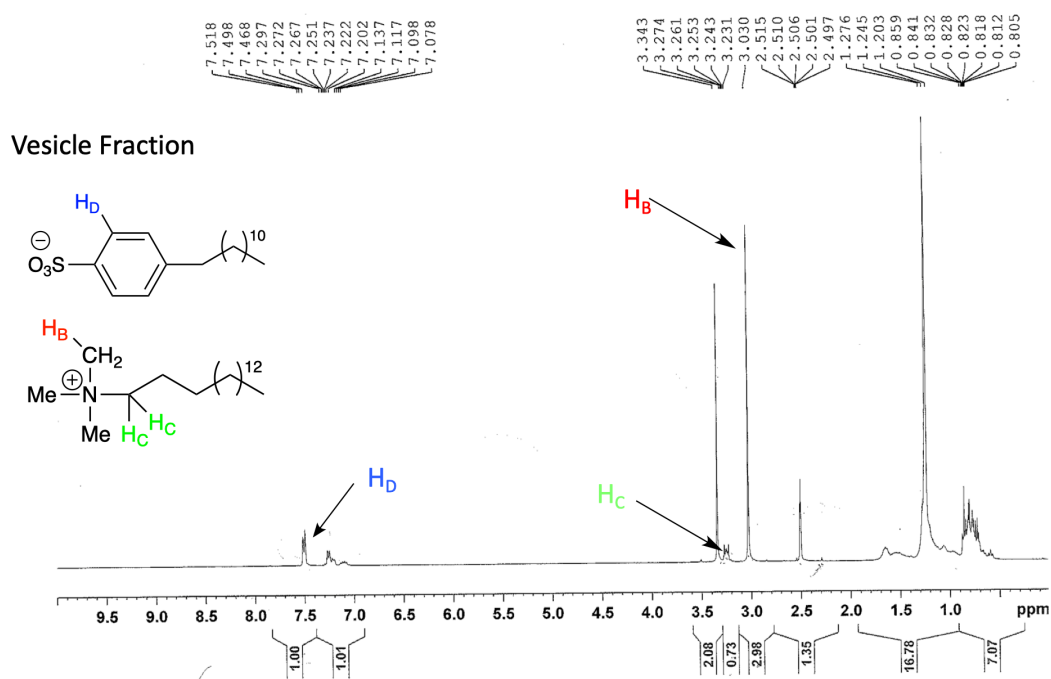

Based on the integrations of peaks  $\text{H}_\text{B}$  and  $\text{H}_\text{D}$ , the molar ratio of SDBS to CTAT in the vesicle fraction (purified vesicles) is 1.5:1. The SDBS:CTAT molar ratio in the crude vesicle mixture was 3:1; thus, the 1.5:1 SDBS:CTAT molar ratio in the SEC purified sample confirms that vesicles were separated from free surfactant during the SEC process. The absence of a peak at 2.291 ppm (the  $\text{H}_\text{A}$  peak in the spectrum of CTAT) shows that tosylate is not present in purified vesicles. A similar analysis was performed on vesicles prepared in PBS and the molar ratio of SDBS to CTAT is 2:1.

To further examine the ability of Sepharose CL-2B SEC to separate free surfactants and micelles from vesicles, a solution of Triton X-100 (0.25% by weight) and SDBS (0.5% by weight) was prepared to simulate free surfactant concentration in vesicle formulations. CTAT was not added to the mixture, so vesicles were not present in the solution. One milliliter of the solution was purified by Sepharose CL-2B SEC with PBS as the eluent. Fractions were collected in the same manner as in the gravimetric analysis and analyzed by TLC-MS. Negative mode ESI-MS was used to detect SDBS (Figure 31) and positive mode ESI-MS was used to detect Triton X-100 (Figure 32). The results of the TLC-MS analysis were consistent with the gravimetric analysis: SDBS was detected in fractions 6-12, and Triton X-100 was detected in fractions 6-11. Most notably, neither SDBS or TX-100 was detected in SV fractions (3.1-5.0 mL) even when the SV fraction was concentrated by a factor of 10.

Figure 31: Negative mode ESI-mass spectra of SEC fractions of a solution of SDBS and Triton X-100 dissolved in PBS. SDBS is detected in negative mode ESI-MS.

#### A: Mass spectrum of SDBS standard

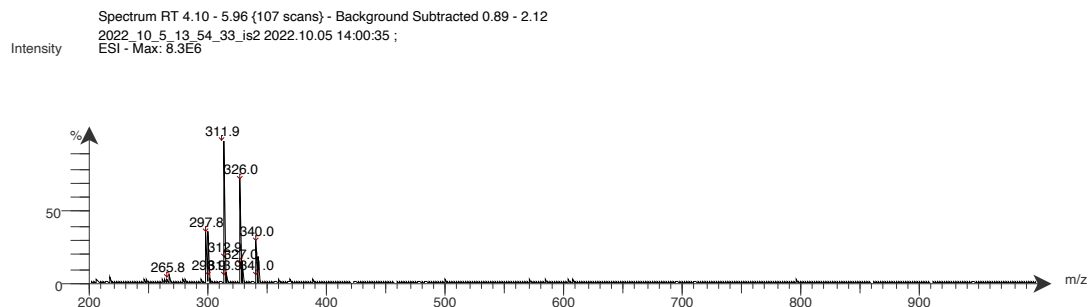

#### B: Mass spectrum of SV fraction

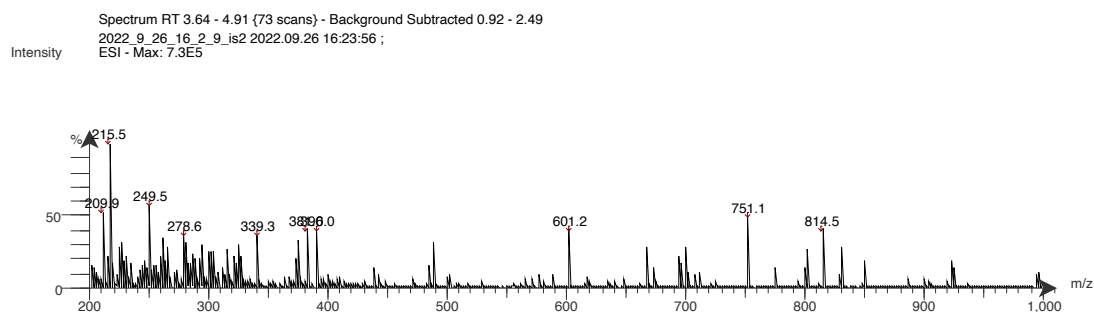

#### C: Mass spectrum of fraction 6

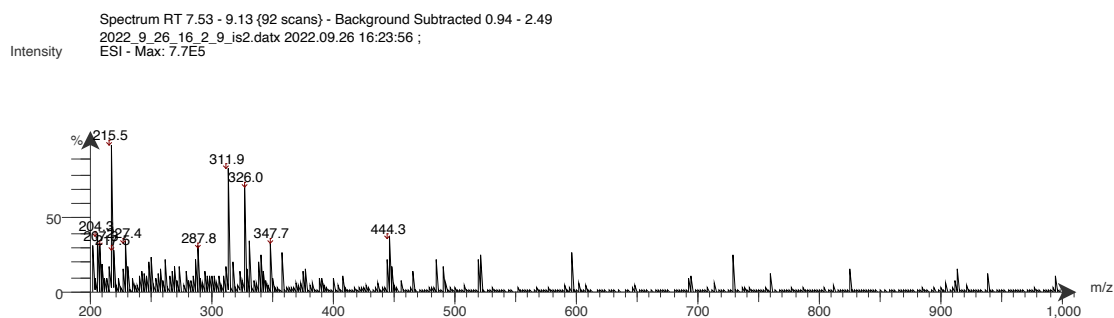

#### D: Mass spectrum of fraction 7

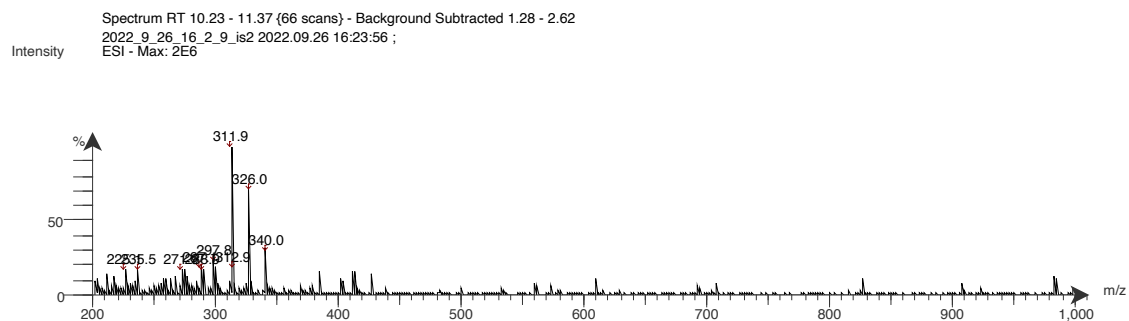

## E: Mass spectrum of fraction 8

Spectrum RT 12.71 - 14.17 (84 scans) - Background Subtracted 1.33 - 2.53  
2022\_9\_26\_16\_2\_9\_is2 2022.09.26 16:23:56 ;  
Intensity ESI - Max: 2.6E6

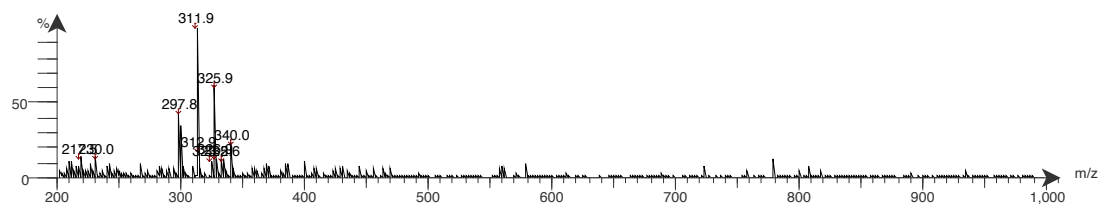

## F: Mass spectrum of fraction 9

Spectrum RT 3.57 - 5.26 (97 scans) - Background Subtracted 0.84 - 2.65  
2022\_9\_27\_10\_44\_52\_is2 2022.09.27 10:52:03 ;  
Intensity ESI - Max: 1.6E6

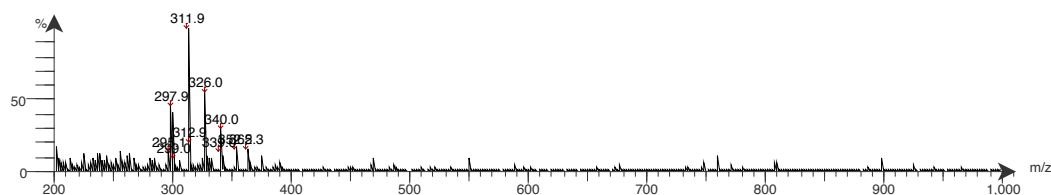

## G: Mass spectrum of fraction 10

Spectrum RT 6.17 - 7.74 (90 scans) - Background Subtracted 0.92 - 2.72  
2022\_9\_27\_10\_44\_52\_is2 2022.09.27 10:52:03 ;  
Intensity ESI - Max: 1E6

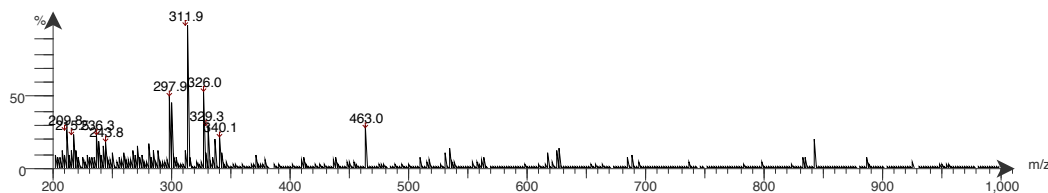

## H: Mass spectrum of fraction 11

Spectrum RT 8.99 - 10.24 (72 scans) - Background Subtracted 1.08 - 2.88  
2022\_9\_27\_10\_44\_52\_is2 2022.09.27 10:52:03 ;  
Intensity ESI - Max: 8.1E5

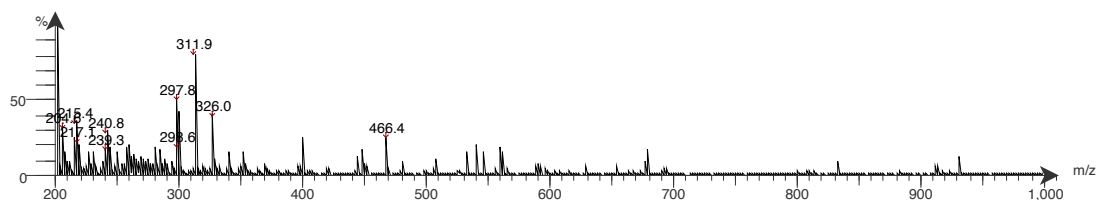



## I: Mass spectrum of fraction 12

Spectrum RT 11.76 - 13.17 (81 scans) - Background Subtracted 1.17 - 3.21  
2022\_9\_27\_10\_44\_52\_is2 2022.09.27 10:52:03 ;  
ESI - Max: 4.3E5

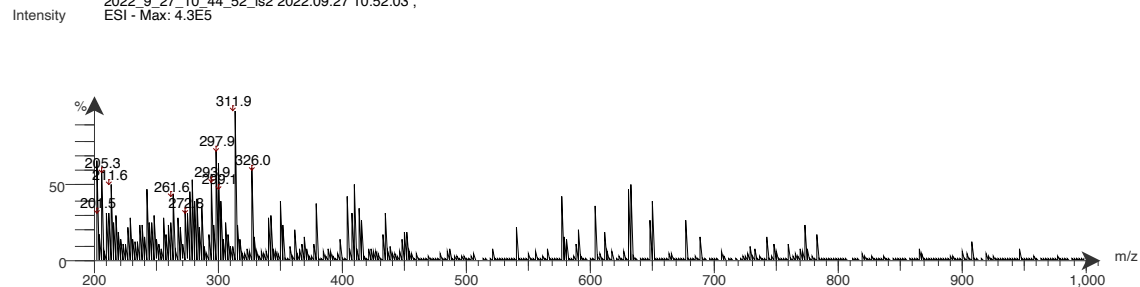

## J: Mass spectrum of fraction 13

Spectrum RT 15.14 - 16.39 (72 scans) - Background Subtracted 1.07 - 2.72  
2022\_9\_27\_10\_44\_52\_is2 2022.09.27 10:52:03 ;  
ESI - Max: 9.3E5

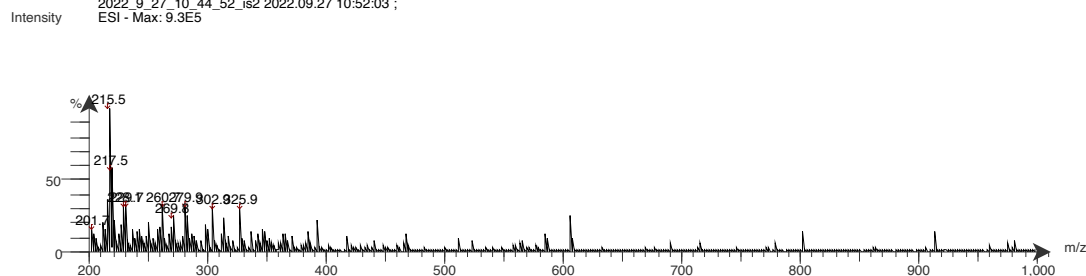

## K: Mass spectrum of SV fraction concentrated by a factor of 10

Spectrum RT 3.94 - 5.42 (85 scans) - Background Subtracted 0.94 - 2.07  
2022\_9\_27\_15\_59\_57\_is2.datx 2022.09.27 16:19:22 ;  
ESI - Max: 9.4E5

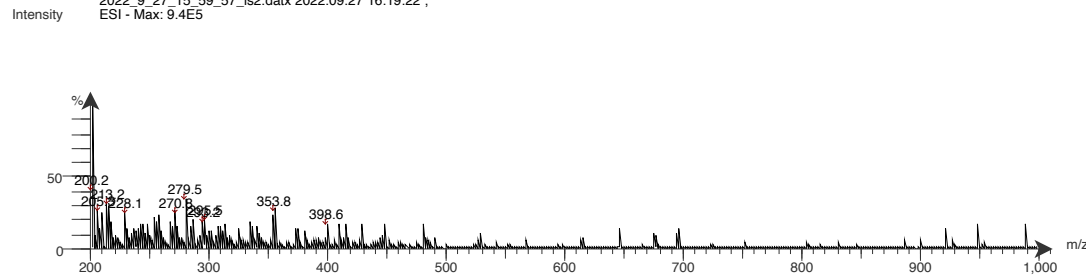

Figure 32: Positive mode ESI-mass spectra of SEC fractions of a solution of SDBS and Triton X-100 dissolved in PBS. Triton X-100 is detected in positive mode ESI-MS.

#### A: Mass spectrum of Triton X-100 standard

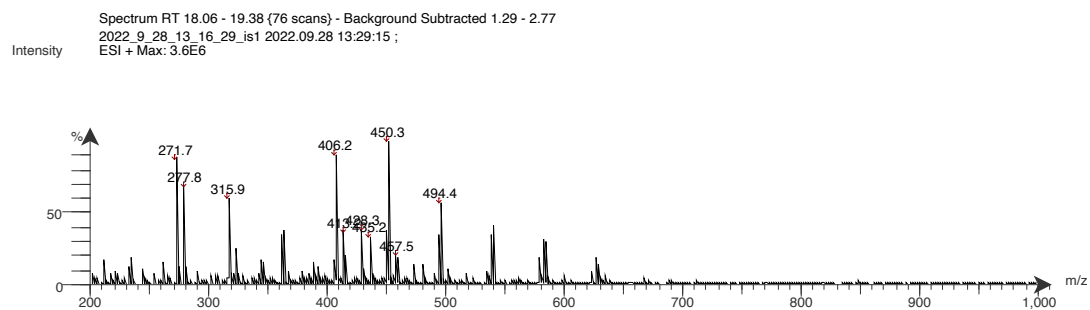

#### B: Mass spectrum of SV fraction

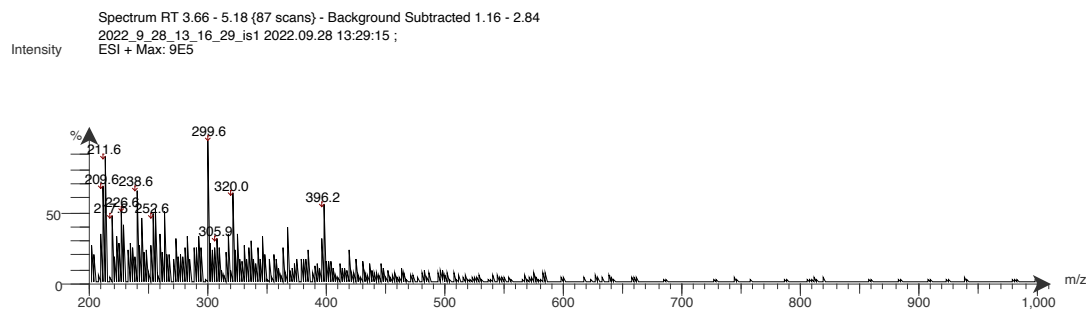

#### C: Mass spectrum of fraction 6

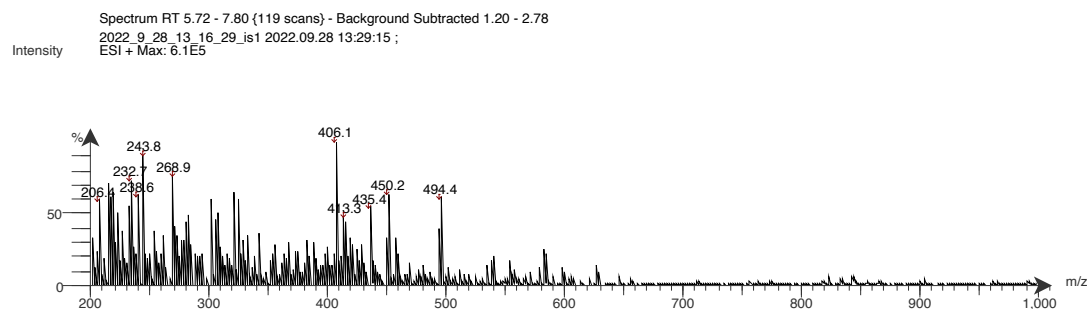

## D: Mass spectrum of fraction 7

Spectrum RT 8.74 - 10.67 {111 scans} - Background Subtracted 1.27 - 2.92  
2022\_9\_28\_13\_16\_29\_is1 2022.09.28 13:29:15 ;  
ESI + Max: 9.1E5

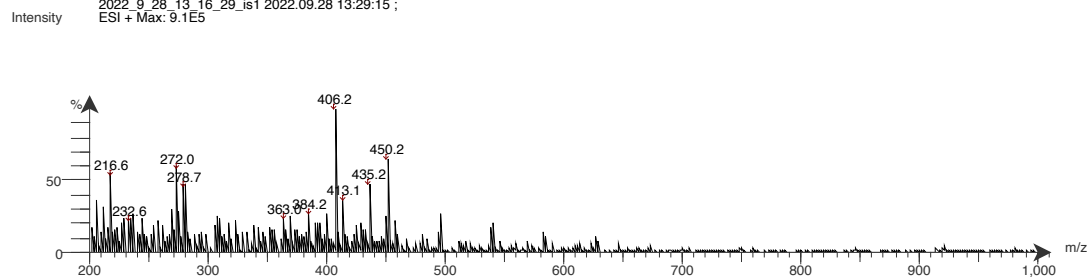

## E: Mass spectrum of fraction 8

Spectrum RT 3.68 - 4.98 {75 scans} - Background Subtracted 1.41 - 2.82  
2022\_10\_4\_14\_3\_34\_is1 2022.10.04 14:07:48 ;  
ESI + Max: 4.3E6

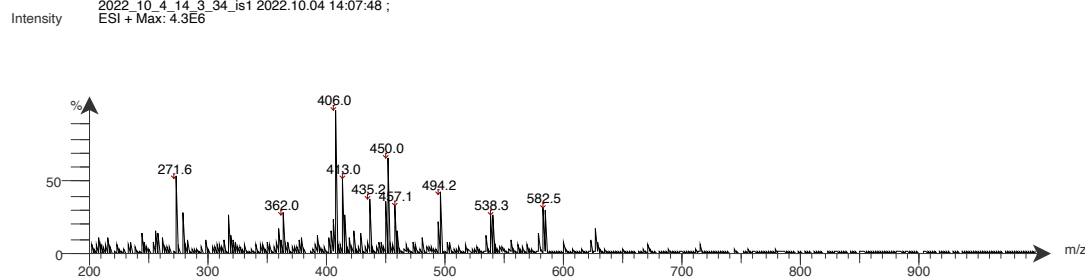

## F: Mass spectrum of fraction 9

Spectrum RT 12.03 - 13.65 {93 scans} - Background Subtracted 1.41 - 2.92  
2022\_9\_28\_13\_16\_29\_is1 2022.09.28 13:29:15 ;  
ESI + Max: 9.7E5

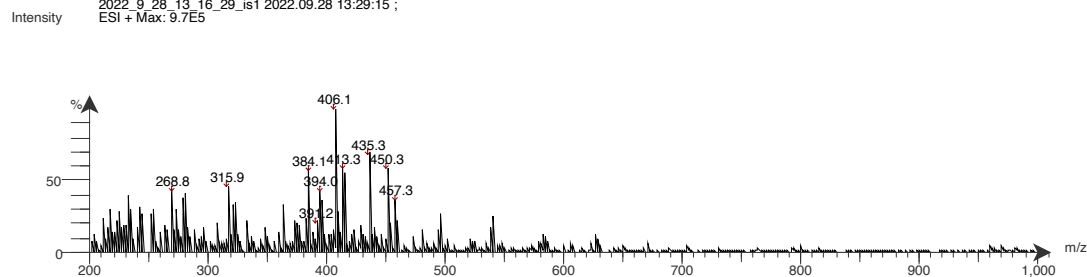

## G: Mass spectrum of fraction 10

Spectrum RT 15.54 - 17.07 {88 scans} - Background Subtracted 1.27 - 2.78  
2022\_9\_28\_13\_16\_29\_is1 2022.09.28 13:29:15 ;  
ESI + Max: 9.1E5

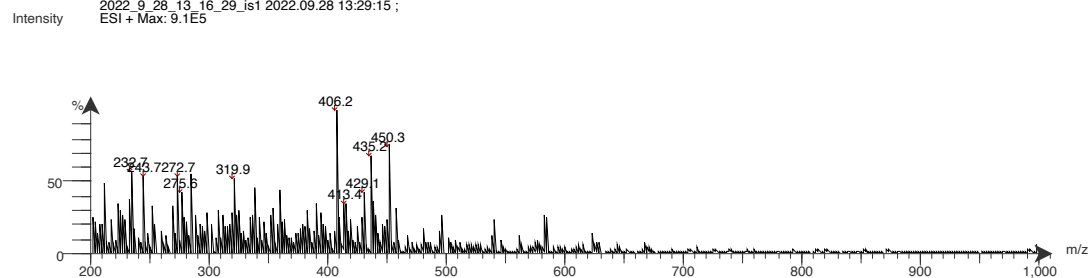

## H: Mass spectrum of fraction 11

Spectrum RT 5.99 - 7.47 (85 scans) - Background Subtracted 1.43 - 2.77  
2022\_10\_4\_14\_3\_34\_is1 2022.10.04 14:07:48 ;  
ESI + Max: 3.8E6

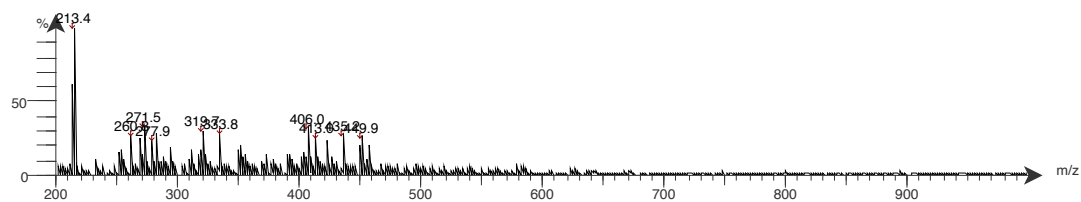

## I: Mass spectrum of fraction 12

Spectrum RT 9.11 - 10.71 (92 scans) - Background Subtracted 1.29 - 2.92  
2022\_10\_4\_14\_3\_34\_is1 2022.10.04 14:07:48 ;  
ESI + Max: 4.1E6

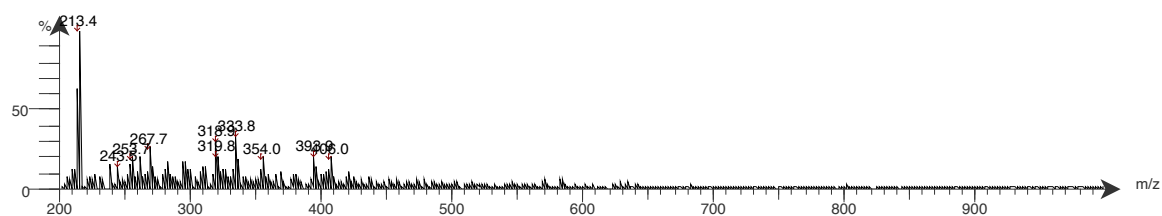

## J: Mass spectrum of SV fraction concentrated by a factor of 10

Spectrum RT 3.88 - 5.53 (95 scans) - Background Subtracted 0.97 - 2.50  
2022\_9\_27\_15\_59\_57\_is1.datx 2022.09.27 16:19:21 ;  
ESI + Max: 1.4E6

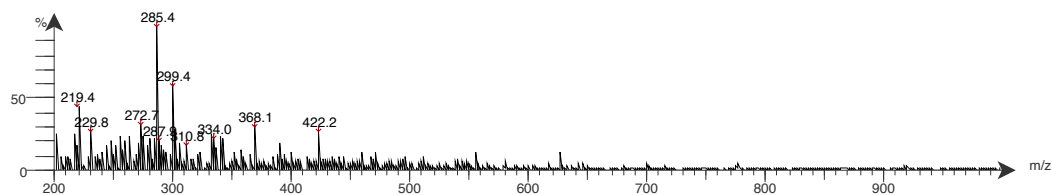

Triton X-100 can be detected and quantified via UV-Vis spectroscopy. SEC fractions of a solution of SDBS and Triton X-100 dissolved in PBS were analyzed at 285 nm (this wavelength has minimal interference from SDBS). The results were consistent with the ESI-MS analysis.

Table 21: UV-Vis spectroscopy data of size exclusion chromatography fractions of a solution of SDBS and Triton X-100 dissolved in PBS.

| Sample      | Corrected Absorbance at 285 nm |
|-------------|--------------------------------|
| SV fraction | 0.0062                         |
| 6           | 0.1054                         |
| 7           | 0.2059                         |
| 8           | 0.1894                         |
| 9           | 0.1794                         |
| 10          | 0.1172                         |
| 11          | 0.0593                         |
| 12          | 0.0298                         |
| 13          | 0.0117                         |
| 14          | 0.0064                         |

Figure 33: UV-Vis spectroscopy data of size exclusion chromatography fractions of a solution of SDBS and Triton X-100 dissolved in PBS.

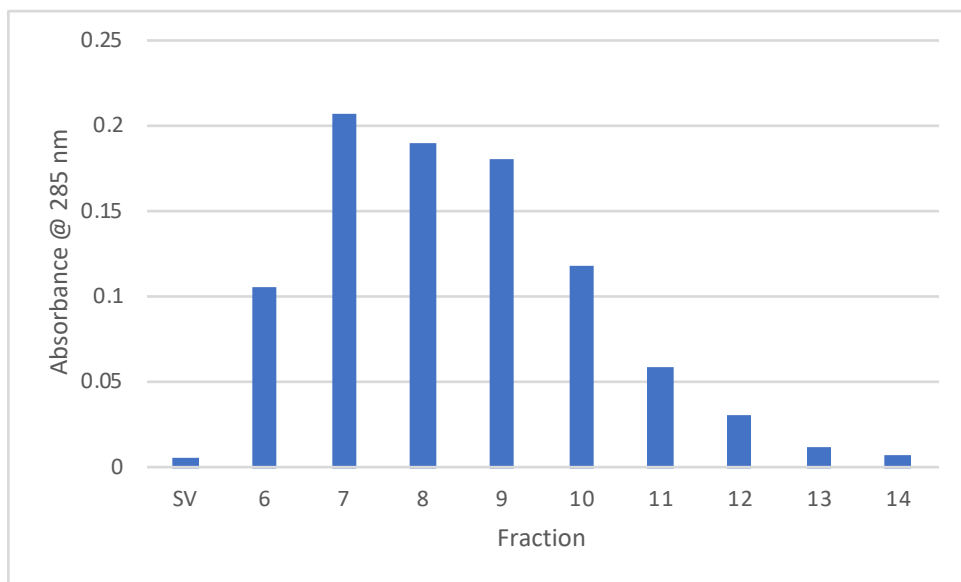

SV = purified Triton X-100 vesicle fraction

Based on absorbance values, 99% of Triton X-100 molecules elute after the vesicle fraction.

## VII. Percent Incorporation and Retention Calculations

To determine the percent of Triton X-100 incorporated into Triton X-100 enriched SVs, Triton X-100 enriched SV samples were purified by SEC and the collected fractions were analyzed by UV-Vis spectroscopy. Triton X100 can be quantified used the absorbance at 285 nm.

Table 22: UV-Vis spectroscopy data of exclusion chromatography fractions of Triton X-100 enriched SVs.

| Sample      | Absorbance at 285 nm |
|-------------|----------------------|
| Crude SV    | 0.2867               |
| SV fraction | 0.2423               |
| Fraction 6  | 0.1765               |
| Fraction 7  | 0.1114               |
| Fraction 8  | 0.0762               |
| Fraction 9  | 0.0534               |
| Fraction 10 | 0.0462               |
| Fraction 11 | 0.0235               |
| Fraction 12 | 0.0138               |
| Fraction 13 | 0.0032               |
| Fraction 14 | -0.0008              |

Crude SV = unpurified Triton X-100 enriched vesicles

SV fraction = purified Triton X-100 vesicle fraction

For analysis, SEC fraction samples were prepared with 4-times more sample than the crude SV sample. During SEC, SVs are diluted by a factor of 2. The SV fraction is 2 mL, while the other SEC fractions are 1 mL.

Figure 34: UV-Vis spectroscopy data of size exclusion chromatography fractions of Triton X-100 enriched SVs.

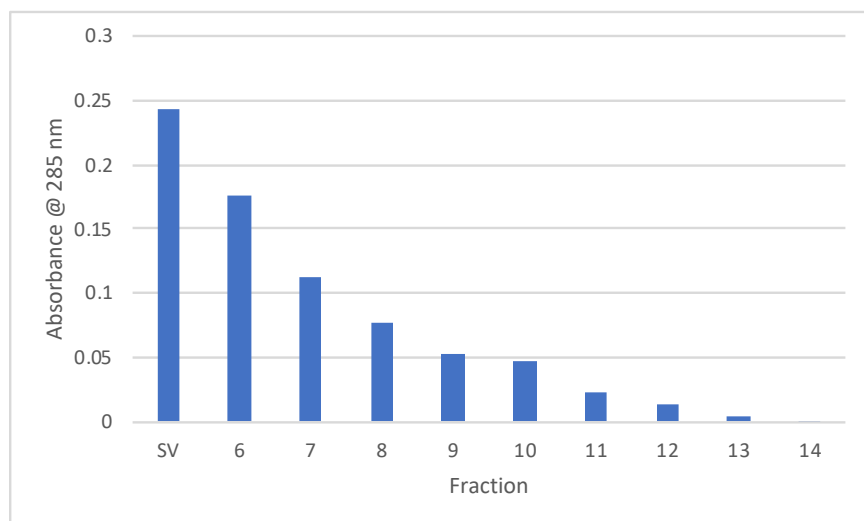

SV = purified Triton X-100 vesicle fraction

Percent incorporation based on SV fraction versus crude SV sample: 44%

Percent incorporation based on total absorbance of SEC fractions: 49%

Average % incorporation: 47%

To determine if Triton X-100 molecules leach out of vesicles during the conjugation step, 1 mL of purified SEC fractions of SVs were purified by SEC a second time and the fractions were analyzed by UV-Vis spectroscopy.

Table 23: UV-Vis spectroscopy data of size exclusion chromatography fractions of twice purified Triton X-100 enriched vesicles

| Sample      | Corrected Absorbance at 285 nm |
|-------------|--------------------------------|
| SV 1X pure  | 0.2123                         |
| SV 2X pure  | 0.1903                         |
| Fraction 6  | 0.0272                         |
| Fraction 7  | 0.0046                         |
| Fraction 8  | 0.0009                         |
| Fraction 9  | 0.0017                         |
| Fraction 10 | -0.0012                        |
| Fraction 11 | 0.0045                         |
| Fraction 12 | -0.0042                        |
| Fraction 13 | -0.006                         |
| Fraction 14 | -0.0072                        |

SV 1X pure = Triton X-100 enriched SVs that were purified once.

SV 2X pure = Triton X-100 vesicle fraction from second purification

Figure 35: UV-Vis spectroscopy data of size exclusion chromatography fractions of twice purified Triton X-100 enriched vesicles.

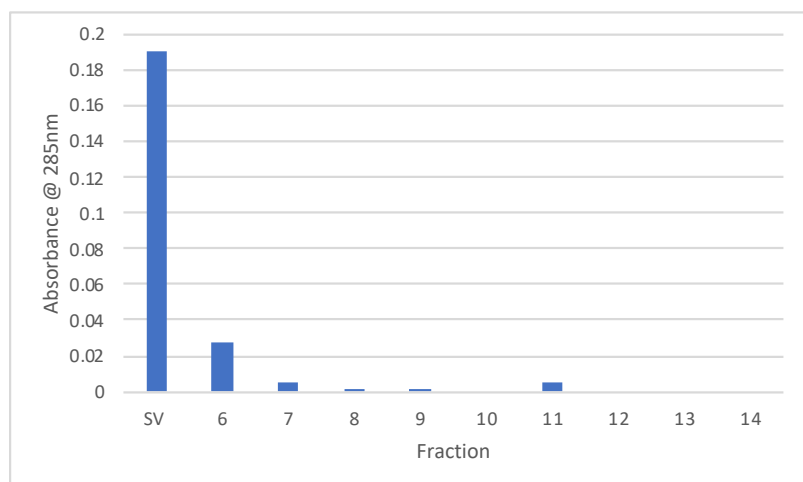

SV = purified Triton X-100 vesicle fraction

Percent retention based on SV 1X pure sample versus crude SV 2X pure sample: 90%

Percent retention based on total absorbance of SEC fractions: 91%

Average % retention: 90%



## VIII. Vesicle Concentration Calculations

Vesicle concentrations were calculated via encapsulation experiments. Vesicles were formed in solutions containing known concentrations of an analyte. Sodium ion, pemetrexed (disodium salt), carboplatin, and cisplatin were used as analytes in separate studies. Vesicles were prepared in a sodium chloride solution to evaluate the encapsulation of sodium ion, while the other vesicle formulations were prepared in solutions of PBS (1X, pH = 7.4) containing pemetrexed (disodium salt), carboplatin, and cisplatin, respectively. Millipore water was used as the eluent for vesicles containing sodium ion, while PBS was used as the eluent for the other vesicle samples. Analyte concentration in purified samples was determined using FAAS (sodium ion),  $^1\text{H}$ -NMR (pemetrexed and carboplatin), and ICP-AES (cisplatin).

Table 24: Encapsulation Data

| Analyte     | [Analyte] in crude SVs, mM | [Analyte] in purified SVs, mM | % incorporation | [SVs], vesicles/mL |
|-------------|----------------------------|-------------------------------|-----------------|--------------------|
| Sodium ion  | 200                        | 1.2                           | 1.2             | 9.5E+12            |
| Pemetrexed  | 84                         | 0.45                          | 0.8             | 6.4E+12            |
| Carboplatin | 40                         | 0.5                           | 1.9             | 1.5E+13            |
| Cisplatin   | 3.3                        | 0.05                          | 2.3             | 2.0E+13            |

Percent incorporation values were calculated using a dilution factor to account for dilution during SEC purification.

The analytes are water soluble and are expected to become encapsulated within the vesicles' lumen, and are not expected to incorporate into the vesicles' bilayers. Therefore, the percent incorporation values are an approximation of the volume percent of solution contained within crude SVs' lumen. This approximation does not account for possible ionic interactions between the analytes and the vesicles' surfaces. However, under the experimental conditions (pH = 7.4), pemetrexed is expected to be predominantly anionic and is not expected to associate with the surface of SDBS-rich vesicles. In addition, [analyte] in the various crude formulations were significantly different, but the % incorporation in the resulting purified samples were similar, indicating that the analytes are not simply binding electrostatically to the surface of vesicles. Based on TLC and  $^1\text{H}$ -NMR analyses of purified vesicles, the estimated concentration of "available" dodecylbenzenesulfonate molecules (dodecylbenzenesulfonate molecules not paired with cetyltrimethylammonium molecules) in unpurified (crude) vesicles prepared in water is 2.8 mM and 4.0 mM for unpurified vesicles prepared in PBS.

### Sample Calculation

Average concentration of sodium ion in purified vesicle samples = 1.2 mM.

Vesicles were diluted by a factor of two during SEC purification:  $1.2\text{mM} \times 2 = 2.4\text{mM}$

$(2.4\text{ mM}/200\text{mM}) \times 100 = 1.2\%$

1.2% of 1 mL = 0.012 mL = total lumen volume in crude sample

Lumen radius of a vesicle with a total radius of 70 nm = Outer diameter – Leaflet =  $70\text{nm} - 3\text{nm} = 67\text{ nm}$

Lumen volume of vesicles with 70 nm radius =  $1.26 \times 10^{-15}\text{ mL}$

Concentration of vesicles (vesicles/mL) =  $0.012\text{ mL}/1.26 \times 10^{-15}\text{ mL} = 9.5 \times 10^{12}$

Average vesicle concentration in crude vesicle samples based on encapsulation studies:  $1.3 \times 10^{13}$  vesicles/mL

## IX. Acid Phosphatase per Vesicle and Percent Surface Area Coverage Calculations

Average acid phosphatase concentration in acid phosphatase functionalized vesicles: 31 µg/mL

The MW of acid phosphatase (from Sigma): 58 kDa

$31\mu\text{g/mL} = 3.2 \times 10^{14}$  acid phosphatase molecules/mL

Average vesicle concentration in crude vesicle samples based on encapsulation studies:  $1.3 \times 10^{13}$  vesicles/mL

Vesicles were purified twice via SEC, resulting in a 4-fold dilution.

$1.3 \times 10^{13}/4 = 3.2 \times 10^{12}$  vesicles/mL in purified AP-SV samples

$3.2 \times 10^{14}$  acid phosphatase molecules/mL  $\div$   $3.2 \times 10^{12}$  vesicles/mL = 100 acid phosphatase molecules/vesicle

Figure 36: Structure of purple acid phosphatase from PDB with estimated longitudinal diameter.

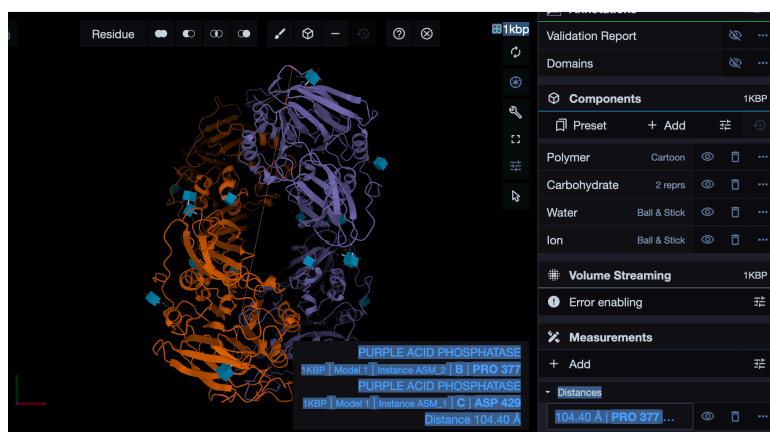

The longitudinal diameter is estimated to be 104.4 angstroms (10.4 nm).

Protein Data Bank in Europe, 30 July 2021, <https://www.ebi.ac.uk/pdbe/entry/pdb/1kbp/>

Surface area of vesicle with 140 nm diameter =  $4\pi r^2 = 4\pi(70^2) = 62000 \text{ nm}^2$

Area occupied by acid phosphatase (sphere with  $r = 5.2 \text{ nm}$ ) =  $\pi r^2 = \pi(5.2^2) = 85 \text{ nm}^2$

Approximate number of acid phosphatase molecules in a close-packed monolayer =  $62000/85 = 730$

Percent surface coverage on acid phosphatase functionalized vesicles =  $(100/730) \times 100 = 14\%$
